1 **Heterogeneity of Transcription Factor binding specificity models within and across cell lines**

2 Mahfuza Sharmin<sup>1,2</sup>, Héctor Corrada Bravo<sup>1,2</sup>, Sridhar Hannenhalli<sup>2,3\*</sup>

3 Center for Bioinformatics and Computational Biology

4 <sup>1</sup>Department of Computer Science

5 <sup>2</sup>Center for Bioinformatics and Computational Biology

6 <sup>3</sup>Department of Cell and Molecular Biology

7 University of Maryland, College park, MD

8 \*Corresponding author

9

10 **Corresponding author**

11 Sridhar Hannenhalli

12 3104G Biomolecular Sciences Building (#296)

13 University of Maryland, College Park, MD 20742, USA

14 301 405 8219 (v) 301 314 1341 (f)

15 [sridhar@umiacs.umd.edu](mailto:sridhar@umiacs.umd.edu)

16

17

18 **Key words:** Heterogeneity, Sequence Pattern, TF binding specificity, Ensemble models, Clustering, Co-  
19 factors, Cell specificity

20

21 **Abstract**

22 Complex gene expression patterns are mediated by binding of transcription factors (TF) to specific  
23 genomic loci. The *in vivo* occupancy of a TF is, in large part, determined by the TF's DNA binding  
24 interaction partners, motivating genomic context based models of TF occupancy. However, the  
25 approaches thus far have assumed a uniform binding model to explain genome wide bound sites for a TF  
26 in a cell-type and as such heterogeneity of TF occupancy models, and the extent to which binding rules  
27 underlying a TF's occupancy are shared across cell types, has not been investigated. Here, we develop an  
28 ensemble based approach (*TRISECT*) to identify heterogeneous binding rules of cell-type specific TF  
29 occupancy and analyze the inter-cell-type sharing of such rules. Comprehensive analysis of 23 TFs, each  
30 with ChIP-Seq data in 4-12 cell-types, shows that by explicitly capturing the heterogeneity of binding  
31 rules, *TRISECT* accurately identifies *in vivo* TF occupancy (93%) substantially improving upon previous  
32 methods. Importantly, many of the binding rules derived from individual cell-types are shared across  
33 cell-types and reveal distinct yet functionally coherent putative target genes in different cell-types.  
34 Closer inspection of the predicted cell-type-specific interaction partners provides insights into context-  
35 specific functional landscape of a TF. Together, our novel ensemble-based approach reveals, for the first  
36 time, a widespread heterogeneity of binding rules, comprising interaction partners within a cell-type,  
37 many of which nevertheless transcend cell-types. Notably, the putative targets of shared binding rules in  
38 different cell-types, while distinct, exhibit significant functional coherence.

## 39 Introduction

40 Transcriptional regulation is critically mediated by the binding of transcription factors (TF) to specific  
41 DNA elements in the genome (JACOB & MONOD 1961; Busby & Ebright 1994). While the *in vitro* binding  
42 specificity of many human TFs has been determined, it is well recognized that the *in vitro* binding  
43 specificity of a TF does not explain its condition-specific *in vivo* binding specificity (Zinzen et al. 2009;  
44 Yáñez-Cuna et al. 2012). This recognition has spurred investigations of additional determinants of *in vivo*  
45 binding, such as heterogeneity of TF's binding motif (Hannenhalli & Levy 2002), homotypic clusters of  
46 binding sites (Dror et al. 2015), cooperative binding of the TF with its partners (Wang et al. 2006),  
47 condition-specific chromatin context (Heintzman et al. 2009), local DNA properties (Dror et al. 2015),  
48 epigenomic context (Gheldof et al. 2010) etc. While overall, both local genomic and epigenomic features  
49 have been deemed important in determining *in vivo* occupancy of a TF, recent reports suggest that *in*  
50 *vivo* binding of a TF can be accurately predicted based only on the genomic signatures near the binding  
51 site (BS) without relying on the epigenomic context (Arvey et al. 2012; Dror et al. 2015); this is consistent  
52 with very recent reports showing that the epigenome itself is encoded by the genomic context  
53 (Whitaker et al. 2015; Benveniste et al. 2014). Taken together, these results strongly suggest that  
54 proximal genomic elements are the primary driver of *in vivo* TF binding. Prior sequence-based models of  
55 *in vivo* TF binding have shown that, somewhat counter-intuitively, the genomic context of a BS, which is  
56 the property of the genome, effectively encodes the condition-specific *in vivo* binding specificity (Arvey  
57 et al. 2012). This can be explained by the substantial plasticity of a TF's interaction with other TFs' and  
58 the modular nature of TF binding cooperatively with other TFs (Friedte & Farnham 2011), such that  
59 availability of specific combination of interacting TFs can guide *in vivo* binding to specific loci where the  
60 BS of the interacting TF are present in close proximity to each other, along with the availability of  
61 corresponding TFs (Hannenhalli & Levy 2002).

62 Previous sequence-based modeling of *in vivo* TF binding was done in a cell type-specific fashion. These  
63 cell type-specific models exhibit substantial *inter*-cell type heterogeneity, as expected, given variation in  
64 the availability of the potentially interacting TFs. However, these previous approaches build a single  
65 model for a cell type, thus implicitly assuming a homogeneous cell type-specific model, and as such have  
66 not investigated *intra*-cell-type model heterogeneity. Such heterogeneity of TF binding 'rule' across the  
67 genome can be expected for the same reason as for the *inter*-cell type heterogeneity. Moreover, in  
68 many instances, a binding specificity model trained in one cell type can predict a subset of *in vivo*  
69 binding in a different cell type (Arvey et al. 2012), suggesting that models of binding, or parts thereof,  
70 may be shared across cell types. Overall, the heterogeneity of sequence-based models of cell type-  
71 specific *in vivo* TF binding, and the extent to which a subset of binding rules (*sub-models*) are shared  
72 across cell types, is not known, motivating the present study.

73 To this end, we have developed an ensemble model based approach (**TRISECT**) to reveal both cell-  
74 specific and cell-independent rules for *in vivo* TF binding. We applied **TRISECT** to 23 TFs, each with  
75 genome-wide *in vivo* binding data in 4 – 12 cell types (a total of 135 TF-cell type combinations). For each  
76 TF, for each cell type, we built ensemble models of *in vivo* TF binding (**EMT**), then decomposed each  
77 **EMT** model into sub-models and clustered the pooled set of sub-models across all cell types using  
78 feature selection. Our comprehensive analyses strongly suggest that the cell type-specific binding rule  
79 for a TF consists of multiple sub-models, supported by our result showing that **EMT** captures the binding  
80 specificity better than previous non-ensemble models (Arvey et al. 2012). Moreover, for many TFs, the  
81 sub-models are shared across cell-types, and interestingly, we found that the putative target genes for

82 similar sub-models across cell types exhibit a high degree of expression and functional coherence,  
83 suggesting that the *in vivo* binding rules are related to function of the gene targets, much more so than  
84 the cell type they are derived from.

85 In further probing the superior performance of *EMT*, we demonstrate that while a model based only on  
86 the known motifs of the reference TF, *i.e.* without incorporating additional potential TF interaction  
87 partners (*NonInteraction* model), can predict *in vivo* binding with ~78% accuracy, when motifs for other  
88 TFs are used in the model (*Interaction* model), the prediction accuracy is substantially increased to over  
89 90%. Moreover, we found that the improvement in prediction accuracy by the *Interaction* model  
90 strongly correlates with the increase in the number of interaction partners, *i.e.*, with model complexity,  
91 suggesting that the *Interaction* model effectively captures the heterogeneity of the binding rule. We  
92 identified and validated, based on literature, the potential interaction partners (we will refer to these as  
93 co-factors) that mediate context-specific binding and function of a TF. Finally, we show that certain TFs  
94 with multiple distinct binding motifs prefer binding to different motifs in different cell types, which may  
95 in part be associated with their inter-cell type variability of co-factors (Slattery et al. 2011).

96 In sum, our analysis reveals distinct sub-models of *in vivo* TF binding within a cell type that are  
97 nevertheless shared across cell types, and the shared sub-models across cell types target distinct yet co-  
98 functional genes in different cell types. A refined understanding of the genomic context of *in vivo*  
99 binding specificity can facilitate future investigations of transcriptional regulation and understanding of  
100 its genetic determinants.

101

## 102 **Results**

### 103 ***TRISECT – Ensemble model of TF binding and the Clustering of sub-models across cell types***

104 **Overview.** The full analysis pipeline, *TRISECT*, is illustrated by Fig 1A. As the first step, , we developed an  
105 ensemble model (*EMT*) to discriminate a TF's *in vivo* bound genomic loci from the background, balancing  
106 model complexity (number of sub-models in the ensemble) against the cross-validation classification  
107 accuracy. Given a set of genome-wide loci bound by a specific TF, we first construct a foreground set of  
108 sequences (100 bps) centered at the ChIP-Seq peak. As a stringent background control, as done  
109 previously (Arvey et al. 2012), we use 100 bps regions ~200 bps away from the peak location (M&M).  
110 We considered a variety of feature sets for discrimination (see below). The *EMT* model was trained using  
111 Adaboost method where each sub-model is a decision tree built from a bootstrap sample (Friedman et  
112 al. 2000; Friedman 2002; Freidman 2008). Next, for a TF, given *EMT* models for all cell types, we  
113 represented each cell type-specific sub-model as a point in a *d*-dimensional space corresponding to *d*  
114 selected features (M&M). We clustered the data points, representing all sub-models in all cell types  
115 considered for a TF, using XY-fused network (*XYF*) (Melssen et al. 2006) such that sub-models within a  
116 cluster represent similar binding rules, either within a cell-type or across cell types.

117 ***EMT Feature sets.*** We considered three types of feature sets for a 100 bps sequence – (i) Kmer:  
118 frequency of occurrence for all 4096 6-mers, (ii) KmerRC: frequency of occurrence for all 2080 6-mers  
119 where a k-mer and its reverse complement were unified, and (iii) aggregate binding scores for 981  
120 vertebrate TF motifs from TRANSFAC database (we used four stringencies for motif match) (M&M); we  
121 refer to these as *pwm* models. We applied *TRISECT* to 23 TFs, each with ChIP-Seq data in 4 to 12 cell

122 types (a total of 135 TF-cell pair *EMTs*), listed in Supplementary Table 1. A TF was included in this study if  
123 (i) TF has narrow-peak data for at least 4 cell lines with at least 4k sites in each cell line, and (ii) TF has  
124 established PWM in TRANSFAC 2011 database. The performance assessment of *EMTs* was conducted  
125 based on 25% held-out dataset. The overall performance is summarized in Fig 1B and details are  
126 provided in Supplementary Table 2.

127 ***EMT performance.*** Fig 1B shows the overall accuracy distribution (over 135 TF-cell type pairs) for the 6  
128 types of models, where the accuracy is quantified using ROCAUC on the test set. We compared the  
129 performances, using Wilcoxon test, among 6 sets of *EMTs* (kmer, kmerRC, and PWM at 4 stringencies)  
130 containing 135 TF-cell type pairs in each set (Fig 1C). We found that kmerRC significantly outperforms  
131 kmer model (Wilcoxon p-value 2.65E-20), consistent with the fact that TF binding occurs on double-  
132 stranded DNA and as such does not have directionality (except in relation with other interacting TFs)  
133 and therefore unifying each kmer with its reverse complement provides a better abstraction of  
134 biological determinants of TF binding. Following this line of reasoning, PWMs provide an even better  
135 abstraction of DNA binding specificity and as expected, the PWM-based models outperform kmer-based  
136 models (p-value, 2.29E-06 comparing kmerRC and pwm1k). Based on relative performances we selected  
137 pwm1k-based *EMT* for feature selection and clustering of sub-models and all subsequent analyses.

138 ***Comparison with previous model.*** Next, we compared *EMT* model (using kmerRC and pwm1k) with  
139 previously published model based on string kernel SVM (*SVM-kmer*) (Arvey et al. 2012). Supplementary  
140 Table 3 lists 17 TFs for which ROCAUC was reported in (Arvey et al. 2012), where the mean accuracy  
141 across multiple cell lines was reported for each TF. We therefore compared the published accuracy with  
142 the mean *EMT* performance of the TF across only the cell types that were considered previously. As  
143 shown in Fig 2, in most cases, *EMT* outperforms *SVM-kmer*. DNase hypersensitive (DHS) of a region  
144 represents its accessibility by DNA-binding proteins and previous studies have shown that integrating  
145 DHS with *in vitro* binding specificity can substantially enhance *in vivo* binding prediction (Arvey et al.  
146 2012; Pique-Regi et al. 2011). Surprisingly, using pwm1k features 6 cases *EMT* outperforms even the  
147 model that integrated DHS with the kmer frequencies in the SVM (green). In a few cases (blue), *SVM-*  
148 *kmer* yields either comparable or improved predictability. Overall, the *EMT* models predict *in vivo*  
149 binding with a greater accuracy than a non-ensemble SVM approach represented by *SVM-kmer* (Arvey  
150 et al. 2012).

151 In sum, we have described a novel ensemble-based approach to *in vivo* binding modeling and  
152 established its superiority relative to *SVM-kmer* across a wide variety of TFs and cell types.

153

### 154 ***TRISECT reveals intra-cell type heterogeneity and inter-cell type sharing of binding rules across cell*** 155 ***types***

156 The architectural difference and performance advantage of *EMT* relative to *SVM-kmer* suggests that  
157 *EMT* might be better able to exploit heterogeneous binding rules across the genome dictated by  
158 different combinations of interacting TFs. For each TF, we clustered the sub-models obtained from  
159 different cell types. As an illustrative example, Fig 3A-B show the cluster-membership matrix for TF *ATF3*  
160 for number of clusters  $k = 16$  and 20. Fig S1 includes such mapping for all other TFs for  $k = 16$ . We found  
161 both cell type-specific (Fig 3B, cluster #6) and ubiquitous (Fig 3C, cluster #20) clusters. Examining the  
162 cluster mapping for all TFs (Fig S1), a wide range of patterns emerge: for certain TFs most clusters map

163 to single cell type, suggesting cell type-specific binding modalities of these TFs (*EP300*, *JUN*), while  
164 certain other TFs have ubiquitously applicable binding rules, such as *YY1* and *TBP*, suggesting cell type  
165 independent binding rules and, presumably, function. Importantly, many clusters consist of sub-models  
166 from multiple, but not all, cell types. We ensured that inter-cell type sharing of *in vivo* binding rule is not  
167 simply due to shared binding loci across cell types (Supplementary Notes & Fig S2). Subsequent analyses  
168 are based on  $k = 16$ ; reasons for this choice are discussed in Supplementary Notes & Fig S3).

169 It is possible that *EMT* can falsely yield multiple sub-models, even in absence of heterogeneity, and  
170 those sub-models can be falsely clustered. We ascertained heterogeneity across sub-models for a TF  
171 from multiple cell types using a *Dudahart test* (Duda et al. 2001) and assessed the clustering tendency of  
172 the sub-models in the  $d$ -dimensional feature space using *Hopkins statistics* (Jain & Dubes 1988). The  
173 *Dudahart test* verifies whether or not a set of data points should be split into two clusters from the  
174 estimate of within-cluster sum of squares for all pairs of clusters versus overall sum of squares; the ratio  
175 of the two sum of squares is quantified as the *dh-ratio*. On the other hand, the *Hopkins statistic* ( $H$ )  
176 compares the nearest neighbor distribution for a random set of points to the same distribution for the  
177 clustered sub-models (M&M). A value close to 0.5 indicates the sub-models are random set of points  
178 with no clustering, a value close to 1 indicates that they form a cluster. Fig 3C-D summarize the *dh-ratio*  
179 and *Hopkins statistic* respectively for 135 TF-cell pairs based on sub-models of TF-cell type pair, and for  
180 each TF after gathering all sub-models under a TF. We found that in all cases the *dh-ratio* is lower than 1  
181 rejecting homogeneity (Fig 3C) and the set of sub-models form clusters (Fig 3D). All tests done for the  
182 analysis are significant ( $p$ -value  $< 0.001$ ) (M&M). Together, the *Dudahart test* and *Hopkins statistic*  
183 strongly suggest that the sub-models are distinct and clusterable, i.e., TF binding rules are  
184 heterogeneous and partly shared across cell types.

185 Next we assessed the functional underpinning of shared binding rules across cell types. Specifically, we  
186 assessed whether two co-clustered loci from different cell types (i.e., obeying similar binding rule) are  
187 functionally associated relative to loci from the same cell type but belonging to different clusters, i.e.,  
188 obeying different binding rules. We devised a cluster-specific scoring of each binding sequence and  
189 assigned each binding site in each cell type to one or more clusters (M&M). As per convention, we  
190 assigned each binding site to the nearest gene as a potential transcriptional target; 95% of the target  
191 genes were within 100 kb from the binding site (median distance 4.5 kbp) (Fig S4). To assess functional  
192 coherence of a cluster, we determined the fraction of gene-pairs in the cluster (regardless of cell type)  
193 that participate in the same pathway as compared to all pairs of target genes within each cell type, and  
194 assessed the significance of enrichment using Fisher test. Likewise, we also estimated the expression  
195 coherence of genes within a cluster (M&M). As shown in Fig 4 and S5: ~40% (respectively, ~18%) multi-  
196 cell type clusters show significantly higher ( $p$ -value  $\leq 0.05$ ) expression-coherence (respectively,  
197 pathway-coherence) than the background (expectation is 5%). Moreover, the pathway and expression  
198 coherence are highly correlated across clusters (spearman correlation=0.56,  $p$ -value=0.02). We  
199 conducted the same set of tests for random clusters of same size as real clusters. In both cases, the  
200 coherence was no greater than the null expectation (Fig 4A-B). In Supplementary Tables 5a-b, we  
201 catalogue all the clusters with mapped target genes and their enriched GO terms.

202 Taken together, these analyses support existence of heterogeneous sets of rule governing *in vivo* TF  
203 binding and that subset of rules are shared across cell types with functional implication.

204

## 205 ***The role of interaction partners in a TF's binding occupancy across cell types***

206 By using 981 PWMs for a comprehensive set of vertebrate TFs as the basis for features, *EMT* implicitly  
207 incorporates the contributions of interaction partners in predicting *in vivo* binding of the reference TF.  
208 To quantify the contribution of interacting motifs, we repeated the *EMT* training and testing using only  
209 the PWMs corresponding to the reference TF. Individual TFs have multiple motifs reported in the  
210 literature (ranging from 1 to 8, with a median of 3; Supplementary Table 6), which can differ  
211 substantially from each other with potential functional implications (Bulyk et al. 2002; Hannenhalli  
212 2008); we refer to these motifs as the *reference motifs*, and the *EMT* model utilizing only the reference  
213 motifs as the *NonInteraction* model and to contrast we refer pwm1k model as *Interaction* model.  
214 Supplementary Table 7 shows the prediction accuracies for the *Interaction* and the *NonInteraction*  
215 *models*; the diagonal elements represent the cross-validation accuracies within a cell type, while the off-  
216 diagonal elements represent the accuracy when *EMT* is trained on one cell type (row) and tested on  
217 another (column). Comparing the diagonal elements for the two models (summarized in Fig 5A), it is  
218 evident that *Interaction models* have higher predictive accuracy than *NonInteraction* models, which is  
219 consistent with the expectation that *in vivo* binding of a TF relies on interactions among several TFs.

220 Next, we conjectured that in the *Interaction* model, allowing for greater numbers of partners allows  
221 learning of more complex binding rules and increase binding prediction accuracy. We therefore assessed  
222 the effect of the length of the region flanking the binding site on prediction accuracy (M&M). We note  
223 that beyond 100bp, due to narrowing of the gap between the foreground and the background region,  
224 the discrimination accuracy is expected to decrease. Despite this, in some cases (Fig 5B & S6), the  
225 increase in ROCAUC beyond 100bp suggests that a larger context may be necessary in these cases to  
226 capture the binding rules. Nevertheless, we chose a sequence context of 100bp to make our model  
227 comparable to the previously published *SVM-kmer* (Arvey et al. 2012).

228 For a given TF, we also quantified the variability of the model accuracy in different cell types (M&M). We  
229 expect a model that relies on cell type-specific interaction partners to be more variable in its  
230 performance accuracy than the one that relies only on the reference motifs. This expectation is borne  
231 out in our analysis (Fig 5C). This suggests that part of the sequence information for *in vivo* binding is  
232 encoded by the TF's own motifs and this does not vary substantially across cell types, while the  
233 additional context- and interaction-dependent part does. However, the small variability in cross-cell type  
234 prediction accuracy when using *NonInteraction* model is likely to come from the heterogeneity of  
235 binding motifs for a TF. We quantified the inter-motif divergence for each TF as either the number of  
236 motifs annotated for the TF, or motif-divergence defined over all motifs-pairs) (M&M). We found that  
237 the *NonInteraction* model performance variability is positively correlated with both measures of motif  
238 divergences (Spearman correlation=0.63, 0.67; p-value=1.2e-3, 6.3e-4 respectively).

239 For the *Interaction* model, the off-diagonal elements in Supplementary Table 7 show relatively high  
240 cross-cell type performance accuracy, suggesting that the binding 'rules' are shared between cell types.  
241 We ensured that the high cross-cell type prediction accuracy is not simply due to shared sequence  
242 information, i.e., the genomic loci on which the model was trained in one cell type does not substantially  
243 overlap with the loci tested in another cell type. Overall, across all TFs and all pairs of cell types, the  
244 fractional overlap in genomic loci ranges from 0 to 10%, with a mean and median of ~4% (Fig 5D). This  
245 suggests that it is the binding rule, independent of specific sequence instances, that is shared across cell  
246 types.

247 Furthermore, we found that when using the *Interaction* models, the cross-cell type accuracy is  
248 symmetric (Spearman correlation of upper and lower triangle in Supplementary Table 7 is 0.68, p-value  
249  $9.5e-53$ ). In other words, a high (respectively, low) accuracy in cell type *Y* using *EMT* trained on cell type  
250 *X* implies a respectively high (respectively, low) accuracy in cell type *X* using the model learnt from cell  
251 type *Y*. This further supports that the interaction-dependent (therefore genomic-context dependent)  
252 binding rules are shared across cell types. In stark contrast, there is a lack of symmetry in cross-cell  
253 prediction accuracy when *NonInteraction* model is used (Spearman correlation = 0.04, p-value 0.4).

254 In sum, our analyses suggest that the cell type-specific TF interactions play critical role in determining  
255 cell type-specific *in vivo* binding. In addition to that, these revealed by *EMT* might be responsible for cell  
256 specific binding of the reference motifs.

257

### 258 ***TRISECT reveals putative co-factors providing insights into cell-specific biological roles of a TF***

259 Our results so far suggest that cell type-specific co-factors of a TF are a major driver of variability in the  
260 *in vivo* binding rules across cell types. To further probe into the functional implications of cell type-  
261 specific co-factors, for each reference TF, we identified its cell type-specific co-factors using the feature  
262 importance of the corresponding motif as estimated by the model. To minimize redundancy, we  
263 excluded motifs with substantially high co-occurrence frequency with at least one of the reference  
264 motifs (M&M). To further minimize false positives, we assessed the enrichment of motif occurrence  
265 near the cell-specific ChIP-Seq peaks of the reference TF relative to background and retained only those  
266 putative co-factor motifs that were significantly enriched (odds ratio > 1.2 and p-value < 0.05, M&M).  
267 The choice of enrichment odds ratio threshold is rationalized in Fig S7, which shows that increasing the  
268 threshold would result in a loss of information for some TFs e.g. REST.

269 Several lines of evidence support the cell type-specific co-factors for a TF identified by *TRISECT*. First, we  
270 found that for ~70% of the models, the putative co-factors are enriched for either heterodimerizing TFs  
271 or for the TF family that the reference TF belongs to (M&M & Supplementary Table 8). The enrichment  
272 of same family as that of reference TF is consistent with the fact that TFs forms dimer with other TFs  
273 preferably from same family (Amoutzias et al. 2008; Dror et al. 2015). We also performed protein  
274 domain enrichment analysis (Supplementary Table 9) using DAVID tool (Huang, Brad T. Sherman, et al.  
275 2009; Huang, Brad T Sherman, et al. 2009), and found that more than 80% of enriched domains are  
276 involved in homo- or hetero-dimerization consistent with Supplementary Table 8.

277 Second, we expect putative co-factors to be expressed at higher level in the specific cell types where  
278 they are deemed as co-factors. For each co-factor (excluding ubiquitous co-factors), we determined the  
279 log-fold difference in expression between the cell types where it is identified as co-factor relative to cell  
280 types where it is not (M&M). The distribution of log fold changes of the co-factors are compared with a  
281 control set of fold ratios as presented in Fig 6A. For most TFs, the co-factors show significantly higher  
282 expression in the relevant cells. This is not true only in 5 cases. Among these, *CTCF* is known as cell type-  
283 independent TF and for two of them (*GABPA* and *NRF1*) we show below, via an independence test, that  
284 they show higher cell independence than other TFs.

285 Third, for each TF's cell type-specific co-factors, we performed biological processes GO term enrichment  
286 analysis using the Gorilla tool (Eden et al. 2009) relative to all 981 motifs as the background. We found



287 significant differences in function among co-factors for a TF in different cell types. Remarkably, the  
288 biological processes can vary across cell types while still being functionally related to the reference TF.  
289 As an illustrative example, Fig 6B shows the enriched BP (false discovery rate  $\leq 10\%$ ) for ATF3 in 4 cell  
290 types. ATF3 is a stress-inducible TF involved in homeostasis (Allen-Jennings et al. 2001; Tanaka et al.  
291 2011), specifically regulating cell-cycle, apoptosis, cell adhesion and signaling (Tanaka et al. 2011). We  
292 found that ATF3 co-factors are enriched for functions related to cell cycle and proliferation in 3 out of 4  
293 cell lines. In stem cell, the identified co-factors are involved in liver regeneration and inflammatory  
294 response, consistent with previous studies showing direct link between ATF3 induction and liver injury  
295 and regeneration in mice (Chen et al. 1996; Su et al. 2002). Furthermore, enrichment of NOTCH and  
296 apoptotic signaling among co-factors in Hepg2 cell line is consistent with role of ATF3 in glucose  
297 homeostasis and other primary functions of the liver (Allen-Jennings et al. 2001). Surprisingly, we find  
298 enrichment of cognition, learning and memory among the co-factors in leukemia cell line. Since  
299 leukemia is a cancerous cell line, non-native gene expression is not unexpected (Lotem et al. 2004;  
300 Lotem et al. 2005). However, even though ATF3 is not known to play a direct role in neuronal function, a  
301 closely functionally and structurally related protein CREB has well documented role in neuronal activity  
302 and long-term memory formation in brain (Mayr & Montminy 2001), raising the possibility that either  
303 ATF3 has a hitherto unknown role in cognition or, alternatively, the same set of co-factors are involved  
304 in memory formation in conjunction with other TFs.

305 For other TFs, the enriched GO-terms at false discovery rate cutoff of 10% (enrichment scores ranges  
306 from 1.22 to 93.75 with a median of 7.44) are listed in Supplementary Table 10 with corresponding  
307 discussion based on literature survey is provided as Supplementary Notes. This can serve as a resource  
308 for further investigation into cell type-specific binding and function of a broad array of TFs. In  
309 Supplementary Tables 5a-b, we catalogue all the clusters with their specific TF interactions (M&M), and  
310 their enriched GO terms.

311 We noted substantial variability in the number of detected co-factors across cell types for a TF.  
312 Interestingly, a literature survey suggests that the cell types where the reference TF has specific  
313 function, the number of co-factors in that cell type is comparatively higher. For example, REST has well-  
314 known neuronal functions and its binding sites in neurons exhibit lack of cognate RE1 motifs (Rockowitz  
315 et al. 2014), suggestive of dependence on co-factors. Consistently, Sknsh (brain cancer cell line) has  
316 highest co-factor cardinality for REST. Similarly, JUN plays specific role in hematopoietic differentiation  
317 and we found that Gm12878 (normal blood cell line) has the largest number of co-factors (Liebermann  
318 et al. 1998). We reasoned that TF with greater cell type-specific roles would exhibit greater variability in  
319 co-factor cardinality. For each TF we measured the variability of its co-factor cardinality across cell types.  
320 As shown in Fig 7A, interestingly, TFs with ubiquitous and invariant roles such as TBP and CTCF have the  
321 least variable co-factor cardinality.

322 We also assessed whether the difference in prediction accuracy achieved by *Interaction* model and the  
323 *NonInteraction* model for a particular TF-cell type pair may reflect the TF's dependence on co-factors.  
324 We measured the normalized distance between the performance (*performance distance*) of *Interaction*  
325 and *NonInteraction* model (M&M) and compared it with co-factor cardinality. As shown in Fig 7C, we  
326 found that the *performance distance* is positively correlated with co-factor cardinality (Spearman  
327 correlation = 0.65, p-value = 2.7E-17).

328 Previous studies have found that the DNA sequence specificity of a TF can be influenced by interaction  
329 with co-factors (Siggers et al. 2011; Slattery et al. 2011). Interestingly, a close inspection of the feature  
330 importance estimated by the *NonInteraction EMT* model shows that in different cell types different  
331 compositions of the reference motifs are utilized. Fig S8 presents all cell type-specific usage of a TF's  
332 motifs; the cells where the motif usage is significantly different from expected usage are marked with  
333 asterisk (M&M). Notably, such diverse usage is observed using *NonInteraction* models, suggesting cell  
334 type-specific motif preference even without any modulation by the co-factors.

335 Taken together, the cell type-specific co-factors revealed by TRISECT are consistent with their cell type-  
336 specific expression and function and may be critical in modulating a TF's cell type-specific biological  
337 function.

338

### 339 Discussion

340 In this study, we have presented a novel ensemble-based framework –*TRISECT*, to investigate intra-cell  
341 type heterogeneity of *in vivo* TF binding rules and inter-cell type commonality thereof. To the best of our  
342 knowledge, this is the first study to show, based on a comprehensive analysis, that *in vivo* binding  
343 specificity rule is composed of multiple components, or sub-models, many of which are shared across  
344 multiple cell types. Tellingly, non-orthologous targets of binding sites across cell types governed by a  
345 shared binding sub-model exhibit a greater functional and expression coherence than targets of binding  
346 sites in the same cell type that are governed by different binding rules. For each TF, *TRISECT* identified  
347 cell type-specific co-factors that are supported by gene expression data and literature studies supporting  
348 their cell type-specific function. As a useful functional resource, for 23 TFs included in this study, we  
349 provide a catalogue of clusters of shared sub-models, along with their putative cell type-specific targets,  
350 the co-factors characterizing the cluster and their function.

351 Our ensemble model not only outperformed the previously reported sequence-based discriminative  
352 model (*SVM-kmer*), but in several cases it outperformed the model that utilizes the chromatin  
353 accessibility in addition to the sequence flanking the binding site (Arvey et al. 2012); paradoxically, some  
354 of the TFs (e.g., JUND) whose *in vivo* binding were deemed to depend less on the sequence context and  
355 more on the chromatin accessibility by the previous SVM approach were found to be adequately  
356 modeled by sequence alone when using the EMT approach. Taken together with our observation that  
357 these TFs depend on a large number of cell-type exclusive co-factors for their *in vivo* binding, these  
358 results suggest that cell type-specific chromatin accessibility is captured, to some extent, by binding sites  
359 for cell type-specific co-factors, shown independently by recent work (Whitaker et al. 2015; Benveniste  
360 et al. 2014). Apart from the modeling approach of a TF's *in vivo* binding specificity, our study differs from  
361 Arvey et al (Arvey et al. 2012) in several other aspects. In discussing cell type-specificity, the previous  
362 study compared the models only in two cell types – GM12878 and K562, while we have investigated in-  
363 depth the cell type-specificity of *TRISECT* across 4-12 cell types. While the previous work primarily  
364 discusses cell type-specificity and ubiquity of their models, by clustering the cell type-specific sub-  
365 models, our work investigates the extent of shared binding rules; cell type-specificity and ubiquity are  
366 extreme cases thereof. In addition to cell type-specific variability in proximal co-factors, we investigated  
367 in much greater depth than the previous work the cross-cell type variability in the preferred motif for  
368 the reference TF. Together, these novel aspects of our study adds to the knowledge of sequence  
369 information that specify a TF's *in vivo* binding in various cell types.

370 Another recent study (Dror et al. 2015) aiming to decipher the determinants of *in vivo* occupancy of a TF  
371 showed that TF binding specificity is influenced by nearby homotypic sites (for the reference TF), the  
372 local nucleotide composition, and certain DNA physical properties. Moreover, a preferred *in vivo* binding  
373 in a homotypic cluster was shown to be related to a preferred nucleotide composition (GC-rich for zinc  
374 finger TFs and AT-rich for homeodomain reference TFs) in the flanking region of the binding site. These  
375 previous findings are consistent with the fact that the co-factors identified by *TRISECT* are enriched for  
376 same family of TFs as the reference TF and thus have similar preference for nucleotide composition as  
377 the reference TF. In the previous work (Dror et al. 2015), the accuracy in discriminating bound vs.  
378 unbound sequences after controlling for the presence of a putative site for the reference TF was modest  
379 (ROCAUC  $\sim$  0.6). Whereas, we have shown that the motifs for the reference TF alone can discriminate  
380 bound from the unbound control sites with ROCAUC  $\sim$  0.78, suggesting that the reference TF are most  
381 informative in determining *in vivo* binding, as also observed in Pique-Regi et al (Pique-Regi et al. 2011),  
382 and the additional power of discriminations comes from the presence of co-factor motifs, as suggested  
383 before (Arvey et al. 2012; Hannenhalli & Levy 2002), or from nucleotide composition and various DNA  
384 physical properties (Dror et al. 2015). Interestingly, DNA flexibility measured by propeller twist (el  
385 Hassan & Calladine 1996) is highly dependent on GC-content (Hancock et al. 2013), which in turn is  
386 related to motif composition, as we have noted. Overall, these seemingly independent properties  
387 (nucleotide composition and DNA physical properties on one hand and motif composition on the other)  
388 may be related. Specific advantage of an ensemble model based on motif composition is that apart from  
389 being highly accurate, it is functionally interpretable and provides insights into a TF's cell type-specific  
390 functions.

391 Context-dependent function of a *cis* regulatory region requires binding of a specific combination of TFs.  
392 This modularity contributes to morphological evolution through changes in *cis* elements controlling  
393 transcription, while avoiding the pleiotropic effects of TF gene's expression change (Prud'homme et al.  
394 2007). Shared sub-models of TF binding rules across cell types, as revealed by *TRISECT*, may suggest  
395 shared history of cell types.

396 The ability of a TF to bind to diverse reference motifs and in conjunction, interact with diverse  
397 combinations of co-factors serves to enhance its functional repertoire across contexts (Meijsing et al.  
398 2009; Arvey et al. 2012). Our analyses indeed reveal cell type-specific preference for the reference motif  
399 as well as the cell type-specific interaction partners of a TF. We found that the expression of cell type-  
400 specific interaction partners to be higher in the cell types where they are expected to interact with the  
401 TF and their function are consistent with the context based on the literature. Thus our study provides  
402 further support for a TF's cell type-specific functions, and more importantly, enables further  
403 investigation into the mechanisms underlying a TF's diverse cell-specific functions.

404

## 405 **Methods**

### 406 ***Data Processing***

407 We downloaded the ChIP-Seq peaks or 23 TFs from ENCODE (Supplementary Table 1). For each TF we  
408 selected only those cell lines for which narrow-peak data was available. We chose the more stringent of  
409 the two criteria – top 5000 most significant peaks, or FDR q-values<0.2 to select binding sites (Arvey et  
410 al. 2012). Relative to the center of ChIP-Seq peaks, the DNA regions of length 100bp were identified as

411 the foreground. As negative control, we sampled flanking regions of 100bp from 200bp away from the  
412 positive sequences. Moreover, control sequences overlapping with any peak were excluded. Due to the  
413 proximity of the negative examples, both foreground and background are expected to have similar GC-  
414 composition (Arvey et al. 2012) and chromatin accessibility. However, we explicitly controlled for the GC  
415 composition using sequence set balancing technique when comparing the foreground and the  
416 background (Whitaker et al. 2015). We discarded any cell line resulting in fewer than 4000 sites.

#### 417 ***Learning EMT***

418 We considered three types of feature set for the sequence specificity model: (a) kmers - frequencies of  
419 4096 6-mers in the 100bp sequence, (b) kmerRC - frequencies of 2080 6-kmer groups equating a k-mer  
420 and its reverse complement, and (c) pwm $lk$  – we take all the positional weight matrices (pwm) from  
421 TRANSFAC 2011 as the features and get the motif hits using PWMSCAN (Levy & Hannenhalli 2002). The  
422 feature value is the sum of pwm-score ( $-\log_{10}(\text{hit score})$ ) obtained from the PWMSCAN; we took the log  
423 of feature values to compensate for the skewed distribution of the number of binding sites. Here,  $lk$   
424 refers to the PWM hit threshold (hit expected every  $l$  kb on average in the genome); we used  $l =$   
425  $1/2/5/10\text{kb}$ .

426 We chose Adaptive boosting (Freidman 2008; Friedman 2002) as our composite model where each sub-  
427 model within the ensemble is a decision tree and each decision tree is constructed based on a bootstrap  
428 sample. We used the Adaboost framework implemented in R gbm package (Ridgeway 2015). In the  
429 framework, Huber loss function is selected to reduce over-fitting. We estimated the classification  
430 accuracy of the model based on 25% held out data set, while 75% data were being used to build each  
431 tissue-specific model.

#### 432 ***Model conversion, Dudahart test and Hopkins statistics***

433 Each sub-model is represented by a point in a  $d$ -dimensional space. Each dimension denotes a feature  
434 and the value along the dimension indicates the importance of the feature for the sub-model.  
435 Therefore, each model (consisting of multiple sub-models) can be represented as a set of points in an  $n$ -  
436 dimensional space where  $n \leq 981$ . For a model, the feature importance was measured based on the  
437 prediction performance improvement by evaluating predictions on an out-of-bag samples. We modified  
438 the gbm package (Ridgeway 2015) implementation of feature-importance to accommodate the  
439 calculation for single tree or the sub-model in question. In other words, we determined the contribution  
440 of a single tree (sub-model) in prediction performance improvement using the same out-of-bag samples.  
441 We disregard the features which do not contribute to any sub-model. We measured dh-ratio (ratio of  
442 within-cluster sum of clusters and overall sum of squares) for all cluster pairs, based on either cell type-  
443 specific set of sub-models, or the pooled set of sub-models across all cell types for a TF. While  
444 calculating dh-ratio, K-nearest neighborhood (KNN) approach was used for clustering. Since the final  
445 output of KNN depends on initial random set of centers, the dh-ratio calculation was repeated 1000  
446 times to ascertain robustness. We noted that all test results were significant ( $p\text{-value} < 0.01$ ).

447 To measure Hopkins statistics (H) the sub-models are again represented as a set of points. H is defined  
448 by the following.

$$H = \frac{\sum_{j=1\dots m} U_j^d}{\sum_{j=1\dots m} U_j^d + \sum_{j=1\dots m} W_j^d}$$

449  $W_j$  are the nearest-neighbor distances of  $m$  randomly chosen points (sub-models), which demarcate the  
450 sampling window.  $U_j$  are the minimum distances of the sub-models from  $m$  random points in the  
451 sampling window. To define the sampling window, we either took 25 to 75 percentile of the feature  
452 values or from  $\delta$  to  $\max(\text{value}) - \delta$  along each dimension, where  $\delta$  denotes the standard deviation of the  
453 feature value (Dubes & Zeng 1987; Zeng & Richard C Dubes 1985; Zeng & Richard C. Dubes 1985). To  
454 estimate p-value, we repeat the above procedure 1000 times and measured the H value. The p-values  
455 ranges from 0.026 to less than 0.001.

#### 456 **Clustering sub-models**

457 For a TF, we obtained sub-models in all cell types, and then clustered all sub-models using K-nearest  
458 neighbor (KNN), where each sub-model is an instance and the features of the instances are individual  
459 feature-importance obtained in the context of respective tissue-specific model. Before feeding into the  
460 KNN, we remove all the features whose cumulative importance over all sub-models is zero. The sub-  
461 models are also clustered using XY-fused version of self-organizing map (Melssen et al. 2006) from  
462 kohonen R package (Wehrens 2015). To make it comparable to KNN, we assumed 100% weight for X  
463 map, i.e. sub-models will be clustered without preexisting label of which sub-models belonged to which  
464 cell.

#### 465 **Assignment of sequences and target genes to the clusters**

466 A cluster of sub-models can be viewed as a new ensemble. We scored each binding site sequence  
467 against each cluster, and a sequence is assigned to a cluster when it is scored above a threshold (of 1) by  
468 the cluster. The choice of the threshold was based on the rationale that the *intercept* (Ridgeway 2015)  
469 of tissue-specific models are  $\sim 1$ , and for a high-confidence positive sequence, the model-score should be  
470 greater than the intercept. Each bound sequence (from all cell lines) is mapped to a set of clusters. For  
471 each bound sequence, the nearest gene on the genome is considered to be its putative target, as per  
472 convention (Zhu et al. 2010). Hence, each cluster corresponds to a set of target genes coming from  
473 different tissues. We arranged the target genes into an  $M$ -by- $N$  array, where  $M$  is the number of cell  
474 lines and  $N$  is the number of clusters. The enriched pathway among the target genes of each cluster was  
475 determined using clusterProfiler R package (Yu et al. 2012).

#### 476 **Measuring functional and expression coherence using Fisher test**

477 We downloaded the KEGG pathways ([www.genome.jp/kegg](http://www.genome.jp/kegg)). We use the following contingency table to  
478 determine whether the target genes from different cell lines that are assigned to the same cluster are  
479 more functionally related than the target genes coming from the same tissue but from different clusters.

| Gene pair across    |     | Cluster<br>(Foreground) | Cell line<br>(Background) |
|---------------------|-----|-------------------------|---------------------------|
| In same<br>Pathway? | Yes | $a$                     | $c$                       |
|                     | No  | $b$                     | $d$                       |

480

481 In the  $M$ -by- $N$  target gene array, we compared all gene-pairs along columns from different rows (same  
482 cluster, different tissues) and the gene-pairs along rows from different columns (same tissue, different

483 cluster) as the background. Then we apply the Fisher exact test in a cluster-centric fashion by comparing  
484 the fraction of foreground gene-pairs in the same pathway relative to the background.

485 Expression coherence tests were designed similarly, based on the following contingency table.

| Gene pair across |     | Cluster<br>(Foreground) | Tissue<br>(Background) |
|------------------|-----|-------------------------|------------------------|
| Co-expressed?    | Yes | <i>a</i>                | <i>c</i>               |
|                  | No  | <i>b</i>                | <i>d</i>               |

486

487 A gene-pair is considered co-expressed if both of the genes are turned on (RNA-seq log2CPM > 1) in  
488 their respective tissues; CPM stands for Counts per Million. CPM, instead of the standard FPKM measure  
489 to quantify gene expression suffices for our purpose as we only compare a gene's expression across  
490 samples, and not with other genes in the same sample. We showed similar trend of expression  
491 coherence with different expression threshold (log2CPM>=5) (Fig S5).

#### 492 **Model variability, and Motif-divergence**

493 Model variability is defined by its normalized-predictability across cell lines. For each model, n ROCAUC  
494 values are obtained on held-out dataset of n cell-lines. Cross-ROCAUC values are normalized by self-  
495 ROCAUC value. Mathematically,  $var_{model_i} = \frac{\sum_{j \neq i, j \in cells} rocauc_j}{rocauc_i}$ .

496 Motif-divergence is defined by the following equation.  $motif.div_{pwms} = \sum_{i,j \in pwms} \frac{dist_{i,j}}{IC_i + IC_j}$ . Here,  
497  $dist_{i,j} = 1/similarity_{i,j}$  and  $IC_i$  is the information content of ith motif. Similarity between two pwms  
498 is calculated following the normalized version of the sum of column correlations (Petrokovski 1996).

#### 499 **Identification of co-factors**

500 EMT provides importance of all features in discriminating the foreground from the background. We  
501 retained all features with nonzero importance. From the initial set, we removed any motif that has 60%  
502 pwm-similarity (consensus overlap) for at least 50% of the binding site locations with any of the  
503 reference motifs. Next, we calculated enrichment of the motif in the foreground binding sites relative to  
504 control sites. We retained the motifs with greater than 1.2-fold enrichment and p-value <= 0.05. The  
505 resulting motifs were considered as cofactor. For further analysis, we considered tissue specific  
506 cofactors by removing common motifs across tissue. For *unique-relaxed* set we excluded co-factors that  
507 are common across all cell-lines, and for *unique-strict* set co-factors common to any two cell lines were  
508 excluded. The functional tissue-specificity measure for a TF is determined using the cardinality-  
509 variability of unique-strict co-factors.

#### 510 **Gene expression and differential gene expression**

511 For gene expression, we used RNA-seq data downloaded from ENCODE (Supplementary Table 4). For  
512 each tissue, we obtained between 2 and 4 RNA-seq samples depending on the availability and obtained  
513 the number of reads aligned to the gene. We corrected for batch effect using ComBat tool (Leek &  
514 Storey 2007). To estimate differential expression between two set of cell lines (those in which a TF is

515 deemed a co-factor, and those where it is not), we used linear model from R package, limma (Smyth  
516 2005).

### 517 ***Enrichment of same family TFs and heterodimerizing TFs***

518 We collected the family name of each PWM and the list of heterodimerizing PWMs based on semi-  
519 automated inspection of TRANSFAC 2011 annotations, based on keywords and further reading of the  
520 description. For hyper-geometric test of family-enrichment, we compared how many co-factors belong  
521 to the family of reference motifs relative to the 981 motifs. Heterodimer enrichment was tested  
522 similarly.

### 523 ***Cluster specific TF-interactions mapping***

524 Cluster-specific co-factors are identified by treating a cluster as a new ensemble of sub-models. We  
525 computed an aggregated relative importance of the features, considering the decision trees of the new  
526 ensemble corresponding to a cluster. Since the set of decision tree has been changed from the original  
527 set of trees from the EMT, some of the detected co-factors may be false positives. We took the  
528 intersection of the features (with non-zero importance) with the 'enriched-nonoverlapped' (or 'distinct-  
529 relaxed' or 'distinct-strict') co-factors of the original EMT. The corresponding enriched GO terms are  
530 determined using a R package called clusterProfiler (Yu et al. 2012).

### 531 ***Tissue-specific pwm for the reference TF***

532 We obtained relative feature importance of the reference motifs from the *Noninteraction* models and  
533 compared them with random expectation. To calculate the random expectation, 1000 *Noninteraction*  
534 models are learned based on randomly sampled 4k sites from among all binding sites across cell-lines.  
535 From 1000 models 1000 relative feature importance is calculated. Each set of relative importance is  
536 assumed a point in p-dimensional space where p is the number of reference motifs. We considered the  
537 relative importance vectors as data points from multivariate normal distribution and for each vector we  
538 calculated the Mahalanobis distances from the centroid which follows a chi-square distribution (Slotani  
539 1964). The degrees of freedom (d) for the chi-squared distribution is determined using maximum  
540 likelihood estimate and a P-value is generated from a chi-square distribution function of d degrees of  
541 freedom.

542

## 543 **Figures**

544 **Figure 1:** (A). Schematic of *TRISECT* pipeline. Different colors represent different binding rules or sub-  
545 models. Rows (a, b, c) represent cell types. Green, pink and yellow colors indicate cell type-specific sub-  
546 models. Each EMT is represented by a bucket of sub-models (top right). Star denotes sub-models and  
547 diamond denotes the corresponding data point after transformation into reduced feature space. The  
548 sub-models across all cell types are clustered. Cyan is common between cell types *a* and *b*, light-brown is  
549 common between cell types *b* and *c*, and purple is common across all three cell types. (B). Accuracy  
550 (ROCAUC) distribution for 6 choices of feature sets for EMT. (C). Comparison of accuracy between all  
551 pairs of 6 feature-set choices. Nodes are labeled with feature type and mean accuracy. Directional edges  
552 are labeled with Wilcoxon p-value.

553 **Figure 2:** Prediction accuracy comparison of EMT against svm-kmer and svm trained using both kmer  
554 and DNase (kmer+DNase), where (A) EMT is trained using kmerRC features, and (B) EMT is trained using  
555 pwm hits with 1kb stringency (*pwm1k*). Each point represent a TF. Except for 3~4 TFs (blue), EMT  
556 outperform svm in all other cases. For some TFs (green), sequence based EMT outperforms  
557 sequence+chromatin based model as well.

558 **Figure 3:** Assessing the existence of sub-models shared across cell types. (A&B). Cluster membership  
559 matrix using k-nearest neighbor clustering. Each row represents a cluster and column represents a cell  
560 type. Each element in the matrix denotes the number of sub-models in the cluster coming from each cell  
561 type. Some clusters consist of sub-models from multiple cells (cluster#20 in B), while some other consist  
562 of sub-models from a single cell type (cluster#6 in A). (C&D). Boxplot of *dh-ratio* and *Hopkins statistic* for  
563 135 TF-cell pairs based on sub-models of TF-cell type pair, and pooling all sub-models for each TF.

564 **Figure 4:** Functional and Expression coherence of sub-model clusters. (A&B) Fraction of multi-cell  
565 clusters found to be coherent using k-nearest neighbor (KNN) and XY-Fused (XYF) self-organizing map  
566 respectively. Mapped.targets denotes when genes are assigned to cluster based on *TRISECT* pipeline,  
567 random.targets indicates the clusters consisting of random genes among all targets and random.genes  
568 indicates the cluster consisting of random genes.

569 **Figure 5:** Association between number of interaction partners and model-accuracy. (A) The trend of  
570 model accuracy with increasing sequence size for TF ZNF143 (selected arbitrarily for illustration). (B).  
571 Comparison of cross-validation prediction accuracy for *Interaction* and *Noninteraction* models. (C).  
572 Comparison of model variability in log scale (cross-cell type performance variability) for *Interaction* and  
573 *Noninteraction* models. (D). Distribution of the fraction of test sequences that fall in one of the four  
574 categories: Overlapped\_true (respectively, overlapped\_false) denotes the correctly (respectively,  
575 incorrectly) classified sequences having at least 50% overlap between the training sequences in one cell  
576 type and the test sequences in another cell type. Nonoverlapped\_true (respectively,  
577 nonoverlapped\_false) denotes correctly (respectively, incorrectly) classified sequences that do not  
578 overlap with any sequence in the training set.

579 **Figure 6:** Functional validation of putative co-factors. (A). Identified co-factors have higher expression in  
580 the cell lines they are detected in. For a TF motif detected as a co-factor in  $n$  cell lines, and not in  
581 another  $m$  cell lines, we calculated fold difference in the TF's expression between the two sets of cell  
582 lines. Each boxplot corresponds to all co-factors of a TF in X-axis. (B). As an example, for ATF3, GO  
583 enrichment analysis of co-factors in four cell types recapitulate the known cell type-specific biological  
584 roles.

585 **Figure 7:** EMT model heterogeneity is associated with cell type-specificity of co-factors. (A) The plot  
586 shows for each TF the variability of co-factor cardinality across cell types. Each point is further labeled  
587 with cell type where the relevant TF has specific usage, based on literature and has largest number of  
588 co-factors. TBP and CTCF are the most ubiquitous TFs. (B) Normalized ROCAUC difference of *Interaction*  
589 and *NonInteraction* models for a specific TF-cell type pair correlates with co-factor cardinality. (C-D)  
590 Cross-cell type variability in motif usage for the reference TF in the *NonInteraction* model, for JUN and  
591 TBP as two extreme examples. JUN shows different binding specificity in different cell types, while TBP  
592 does not.

593



594 **Supplemental information**

595 Supplemental Figures, S1-S8

596 Supplementary Tables, 1-10

597 Supplementary Notes, 1-3

598

599 **Disclosure Declaration**

600 None

601

602 **Authors' contributions**

603 S.H. conceived the project. S.H. and M.S. designed the analyses in consultation with H.C.B. M.S.

604 performed the analyses. S.H. and M.S. wrote the manuscript with help from H.C.B.

605

606 **Acknowledgements**

607 This work was supported by NIH R01GM100335 to S.H. and NIH R01HG005220 to H.C.B. We thank Justin

608 Malin and Avinash Das for helpful comments and suggestions. M.S. wishes to thank Justin Malin and

609 Hiren Karathia for extensive discussion on heterodimerization and biological processes.

610

611 **References**

612 Allen-Jennings, A.E. et al., 2001. The roles of ATF3 in glucose homeostasis. A transgenic mouse  
613 model with liver dysfunction and defects in endocrine pancreas. *The Journal of biological*  
614 *chemistry*, 276(31), pp.29507–29514.

615 Amoutzias, G.D. et al., 2008. Choose your partners: dimerization in eukaryotic transcription  
616 factors. *Trends in Biochemical Sciences*, 33(5), pp.220–229.

617 Arvey, A. et al., 2012. Sequence and chromatin determinants of cell-type-specific transcription  
618 factor binding. *Genome Research*, 22(9), pp.1723–1734.

619 Benveniste, D. et al., 2014. Transcription factor binding predicts histone modifications in human  
620 cell lines. *Proceedings of the National Academy of Sciences of the United States of America*,  
621 111(37), pp.13367–13372.

622 Bulyk, M.L., Johnson, P.L.F. & Church, G.M., 2002. Nucleotides of transcription factor binding  
623 sites exert interdependent effects on the binding affinities of transcription factors. *Nucleic*  
624 *acids research*, 30(5), pp.1255–1261.

- 625 Busby, S. & Ebright, R.H., 1994. Promoter structure, promoter recognition, and transcription  
626 activation in prokaryotes. *Cell*, 79(5), pp.743–746.
- 627 Chen, B.P., Wolfgang, C.D. & Hai, T., 1996. Analysis of ATF3, a transcription factor induced  
628 by physiological stresses and modulated by gadd153/Chop10. *Molecular and cellular*  
629 *biology*, 16(3), pp.1157–1168.
- 630 Dror, I. et al., 2015. A widespread role of the motif environment in transcription factor binding  
631 across diverse protein families. *Genome research*.
- 632 Dubes, R.C. & Zeng, G., 1987. A test for spatial homogeneity in cluster analysis. *Journal of*  
633 *Classification*, 4(1), pp.33–56.
- 634 Duda, R., Hart, P. & Stork, D., 2001. Pattern Classification. *New York: John Wiley, Section*,  
635 p.680.
- 636 Eden, E. et al., 2009. GOrilla: a tool for discovery and visualization of enriched GO terms in  
637 ranked gene lists. *BMC bioinformatics*, 10, p.48.
- 638 Freidman, J.H., 2008. Greedy Function Approximation□: A Gradient Boosting Machine Author  
639 ( s ): Jerome H . Friedman Source□: The Annals of Statistics , Vol . 29 , No . 5 ( Oct ., 2001  
640 ), pp . 1189-1232 Published by□: Institute of Mathematical Statistics Stable URL□:  
641 [http://www. Institut of Mathematical Statistics](http://www.Institut of Mathematical Statistics), 29(5), pp.1189–1232.
- 642 Friedman, J., Hastie, T. & Tibshirani, R., 2000. Additive Logistic Regression: a Statistical View  
643 of Boosting. *The Annals of Statistics*, 28(2), pp.337–407.
- 644 Friedman, J.H., 2002. Stochastic gradient boosting. *Computational Statistics and Data Analysis*,  
645 38(4), pp.367–378.
- 646 Frieze, S. & Farnham, P.J., 2011. Transcription factor effector domains. *Sub-cellular*  
647 *biochemistry*, 52, pp.261–277.
- 648 Gheldof, N. et al., 2010. Cell-type-specific long-range looping interactions identify distant  
649 regulatory elements of the CFTR gene. *Nucleic Acids Research*, 38(13), pp.4325–4336.
- 650 Hancock, S.P. et al., 2013. Control of DNA minor groove width and Fis protein binding by the  
651 purine 2-amino group. *Nucleic acids research*, 41(13), pp.6750–6760.
- 652 Hannenhalli, S., 2008. Eukaryotic transcription factor binding sites--modeling and integrative  
653 search methods. *Bioinformatics (Oxford, England)*, 24(11), pp.1325–1331.
- 654 Hannenhalli, S. & Levy, S., 2002. Predicting transcription factor synergism. *Nucleic acids*  
655 *research*, 30(19), pp.4278–4284.

- 656 El Hassan, M.A. & Calladine, C.R., 1996. Propeller-twisting of base-pairs and the  
657 conformational mobility of dinucleotide steps in DNA. *Journal of molecular biology*,  
658 259(1), pp.95–103.
- 659 Heintzman, N.D. et al., 2009. Histone modifications at human enhancers reflect global cell-type-  
660 specific gene expression. *Nature*, 459(7243), pp.108–112.
- 661 Huang, D.W., Sherman, B.T. & Lempicki, R.A., 2009. Bioinformatics enrichment tools: Paths  
662 toward the comprehensive functional analysis of large gene lists. *Nucleic Acids Research*,  
663 37(1), pp.1–13.
- 664 Huang, D.W., Sherman, B.T. & Lempicki, R.A., 2009. Systematic and integrative analysis of  
665 large gene lists using DAVID bioinformatics resources. *Nature protocols*, 4(1), pp.44–57.
- 666 JACOB, F. & MONOD, J., 1961. Genetic regulatory mechanisms in the synthesis of proteins.  
667 *Journal of molecular biology*, 3, pp.318–356.
- 668 Jain, A.K. & Dubes, R.C., 1988. *Algorithms for Clustering Data*,
- 669 Leek, J.T. & Storey, J.D., 2007. Capturing heterogeneity in gene expression studies by surrogate  
670 variable analysis. *PLoS Genetics*, 3(9), pp.1724–1735.
- 671 Levy, S. & Hannonhalli, S., 2002. Identification of transcription factor binding sites in the human  
672 genome sequence. *Mammalian genome* □: official journal of the International Mammalian  
673 Genome Society, 13(9), pp.510–514.
- 674 Liebermann, D.A., Gregory, B. & Huffman, B., 1998. AP-1 (Fos/Jun) transcription factors in  
675 hematopoietic differentiation and apoptosis (Review). *International Journal of Oncology*,  
676 12(3), pp.685–700.
- 677 Lotem, J. et al., 2005. Human cancers overexpress genes that are specific to a variety of normal  
678 human tissues. *Proceedings of the National Academy of Sciences of the United States of*  
679 *America*, 102(51), pp.18556–18561.
- 680 Lotem, J. et al., 2004. Induction in myeloid leukemic cells of genes that are expressed in  
681 different normal tissues. *Proceedings of the National Academy of Sciences of the United*  
682 *States of America*, 101(45), pp.16022–16027.
- 683 Mayr, B. & Montminy, M., 2001. Transcriptional regulation by the phosphorylation-dependent  
684 factor CREB. *Nature reviews. Molecular cell biology*, 2(8), pp.599–609.
- 685 Meijsing, S.H. et al., 2009. DNA binding site sequence directs glucocorticoid receptor structure  
686 and activity. *Science (New York, N.Y.)*, 324(5925), pp.407–410.
- 687 Melssen, W., Wehrens, R. & Buydens, L., 2006. Supervised Kohonen networks for classification  
688 problems. *Chemometrics and Intelligent Laboratory Systems*, 83(2), pp.99–113.

- 689 Pietrokovski, S., 1996. Searching databases of conserved sequence regions by aligning protein  
690 multiple-alignments. *Nucleic Acids Research*, 24(19), pp.3836–3845.
- 691 Pique-Regi, R. et al., 2011. Accurate inference of transcription factor binding from DNA  
692 sequence and chromatin accessibility data. *Genome Research*, 21(3), pp.447–455.
- 693 Prud'homme, B., Gompel, N. & Carroll, S.B., 2007. Emerging principles of regulatory  
694 evolution. *Proceedings of the National Academy of Sciences of the United States of*  
695 *America*, 104 Suppl , pp.8605–8612.
- 696 Ridgeway, G., 2015. Generalized Boosted Regression Models.
- 697 Rockowitz, S. et al., 2014. Comparison of REST Cistromes across Human Cell Types Reveals  
698 Common and Context-Specific Functions. *PLoS Computational Biology*, 10(6).
- 699 Siggers, T. et al., 2011. Non-DNA-binding cofactors enhance DNA-binding specificity of a  
700 transcriptional regulatory complex. *Molecular Systems Biology*, 7.
- 701 Slattery, M. et al., 2011. Cofactor binding evokes latent differences in DNA binding specificity  
702 between hox proteins. *Cell*, 147(6), pp.1270–1282.
- 703 Slotani, M., 1964. Tolerance regions for a multivariate normal population. *Annals of the Institute*  
704 *of Statistical Mathematics*, 16(1), pp.135–153.
- 705 Smyth, G., 2005. limma: Linear Models for Microarray Data. In R. Gentleman et al., eds.  
706 *Bioinformatics and Computational Biology Solutions Using R and Bioconductor*. Springer-  
707 Verlag, pp. 397–420. Available at: [http://dx.doi.org/10.1007/0-387-29362-0\\_23](http://dx.doi.org/10.1007/0-387-29362-0_23).
- 708 Su, A.I. et al., 2002. Gene expression during the priming phase of liver regeneration after partial  
709 hepatectomy in mice. *Proceedings of the National Academy of Sciences of the United States*  
710 *of America*, 99(17), pp.11181–11186.
- 711 Tanaka, Y. et al., 2011. Systems analysis of ATF3 in stress response and cancer reveals opposing  
712 effects on pro-apoptotic genes in p53 pathway. *PLoS ONE*, 6(10).
- 713 Wang, L., Jensen, S. & Hannenhalli, S., 2006. An interaction-dependent model for transcription  
714 factor binding. *Systems Biology and Regulatory Genomics*, pp.225–234.
- 715 Wehrens, R., 2015. kohonen: Supervised and Unsupervised Self-Organising Maps.
- 716 Whitaker, J.W., Chen, Z. & Wang, W., 2015. Predicting the human epigenome from DNA  
717 motifs. *Nature methods*, 12(3), pp.265–72, 7 p following 272.
- 718 Yáñez-Cuna, J.O. et al., 2012. Uncovering cis-regulatory sequence requirements for context-  
719 specific transcription factor binding. *Genome Research*, 22(10), pp.2018–2030.

- 720 Yu, G. et al., 2012. clusterProfiler: an R Package for Comparing Biological Themes Among  
721 Gene Clusters. *OMICS: A Journal of Integrative Biology*, 16(5), pp.284–287.
- 722 Zeng, G. & Dubes, R.C., 1985. A comparison of tests for randomness. *Pattern Recognition*,  
723 18(2), pp.191–198. Available at:  
724 <http://www.sciencedirect.com/science/article/pii/0031320385900433> [Accessed August 17,  
725 2015].
- 726 Zeng, G. & Dubes, R.C., 1985. A test for spatial randomness based on k-NN distances. *Pattern*  
727 *Recognition Letters*, 3(2), pp.85–91. Available at:  
728 <http://www.sciencedirect.com/science/article/pii/0167865585900133> [Accessed August 17,  
729 2015].
- 730 Zhu, L.J. et al., 2010. ChIPpeakAnno: a Bioconductor package to annotate ChIP-seq and ChIP-  
731 chip data. *BMC bioinformatics*, 11, p.237.
- 732 Zinzen, R.P. et al., 2009. Combinatorial binding predicts spatio-temporal cis-regulatory activity.  
733 *Nature*, 462(7269), pp.65–70.
- 734

**A**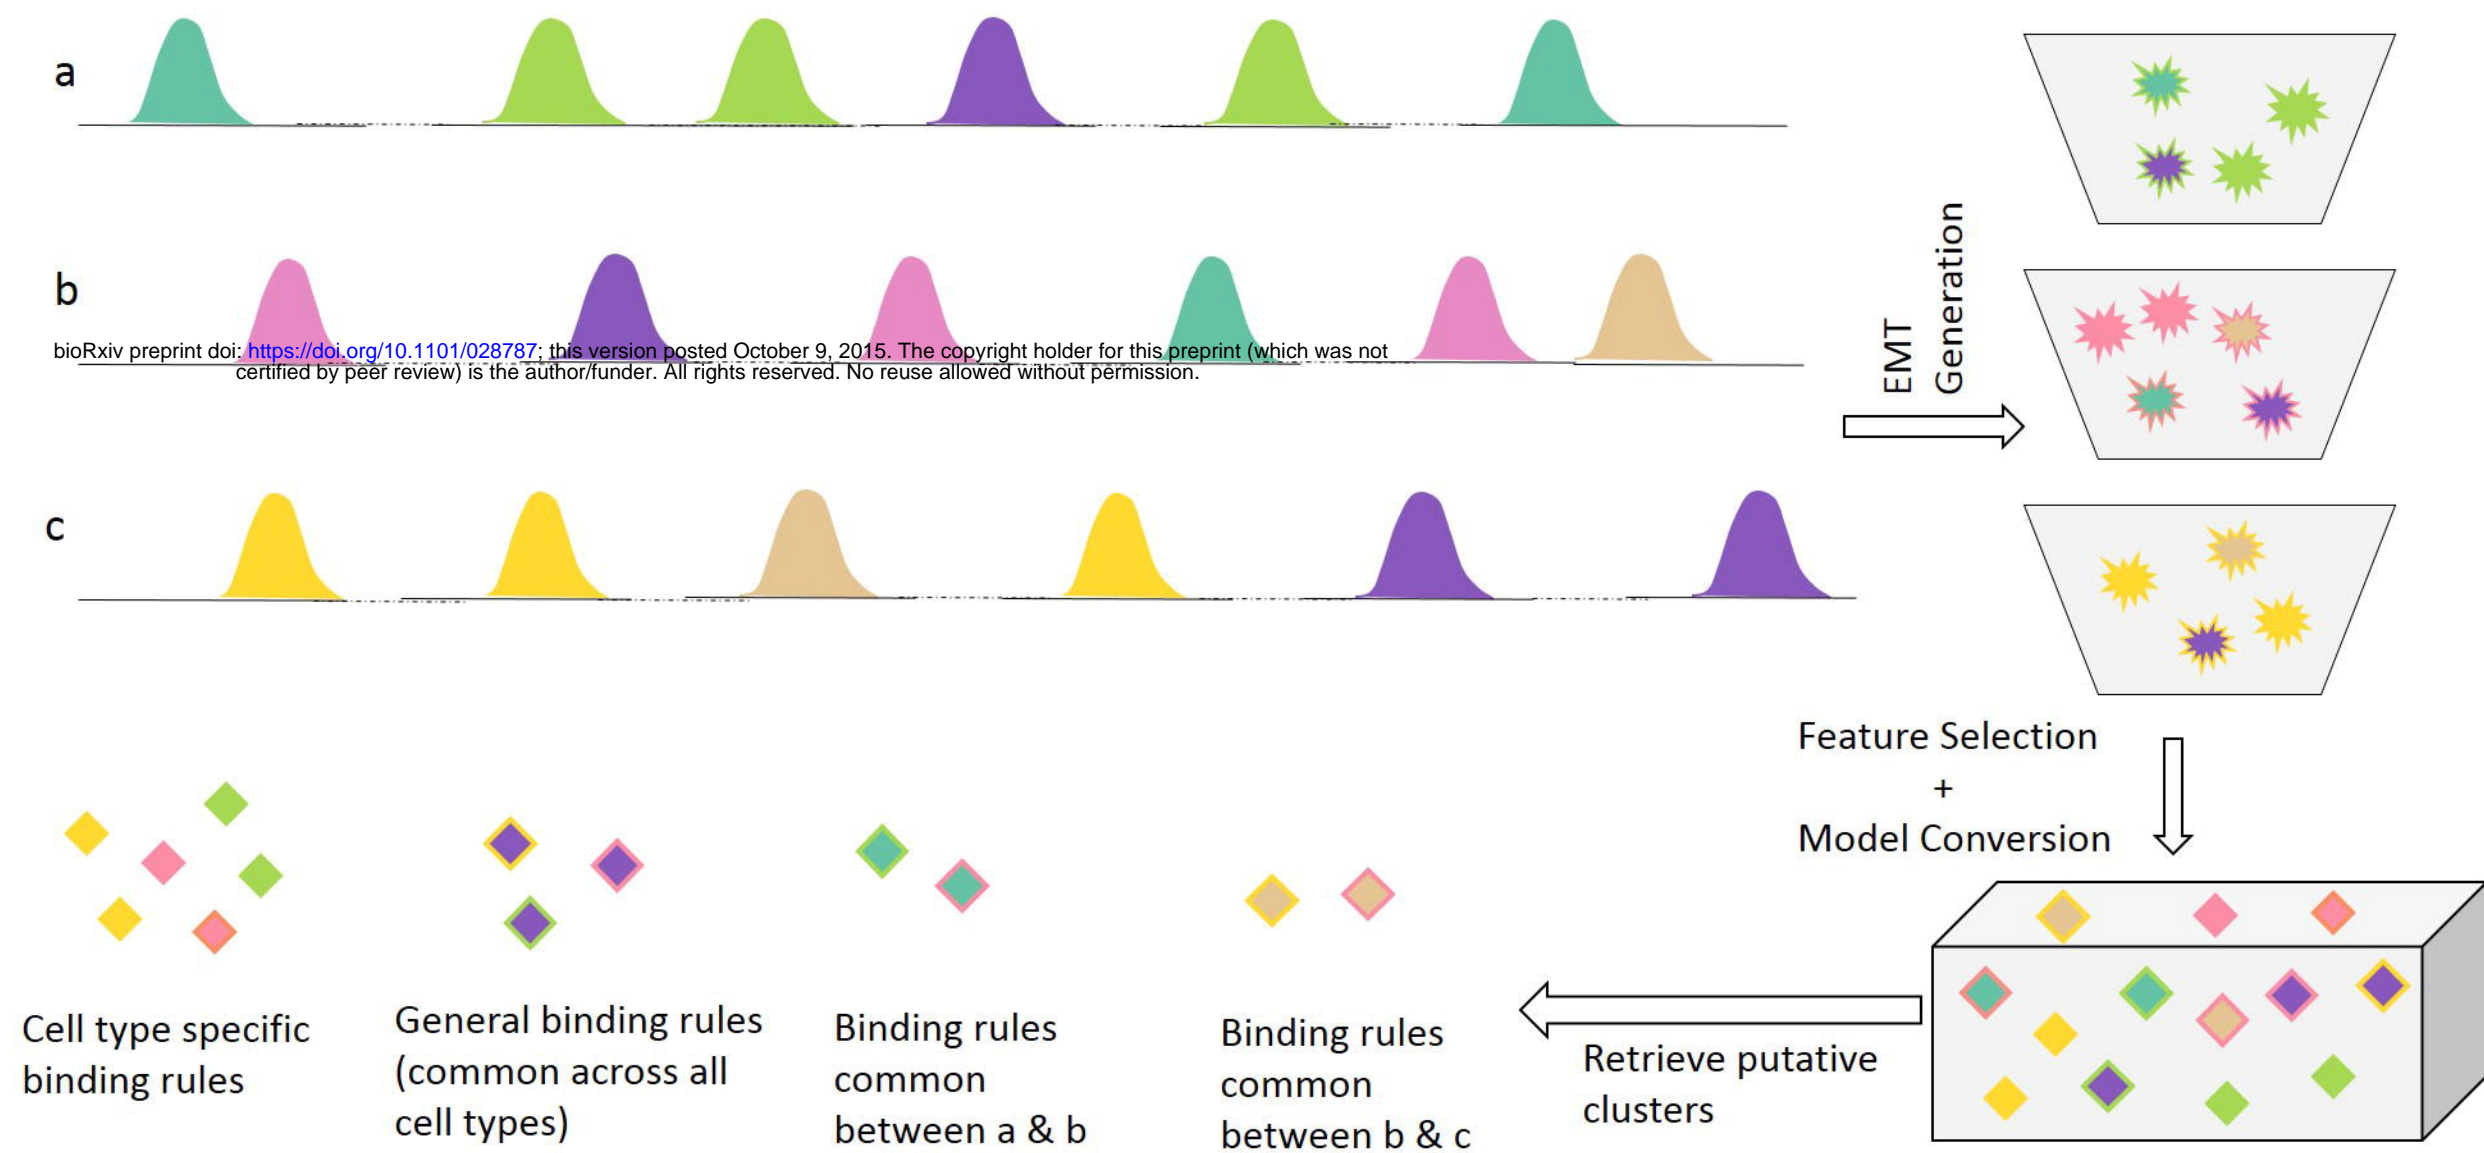**B**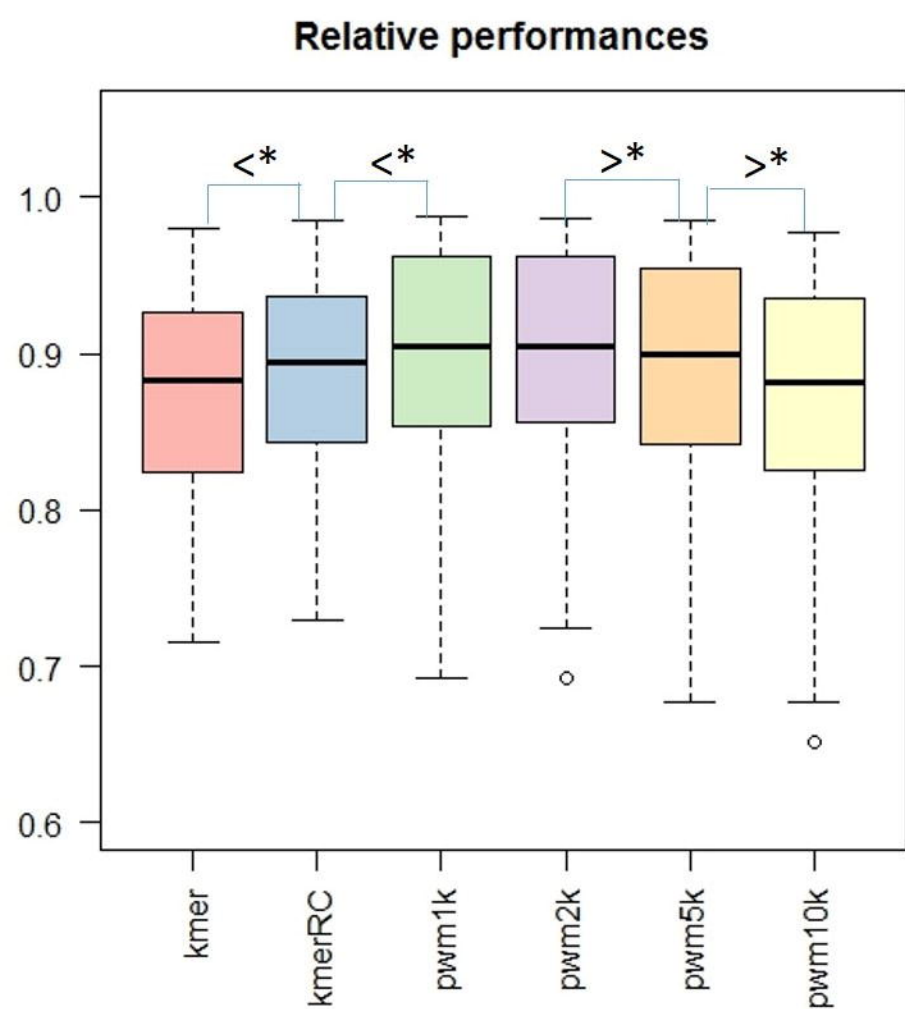**C**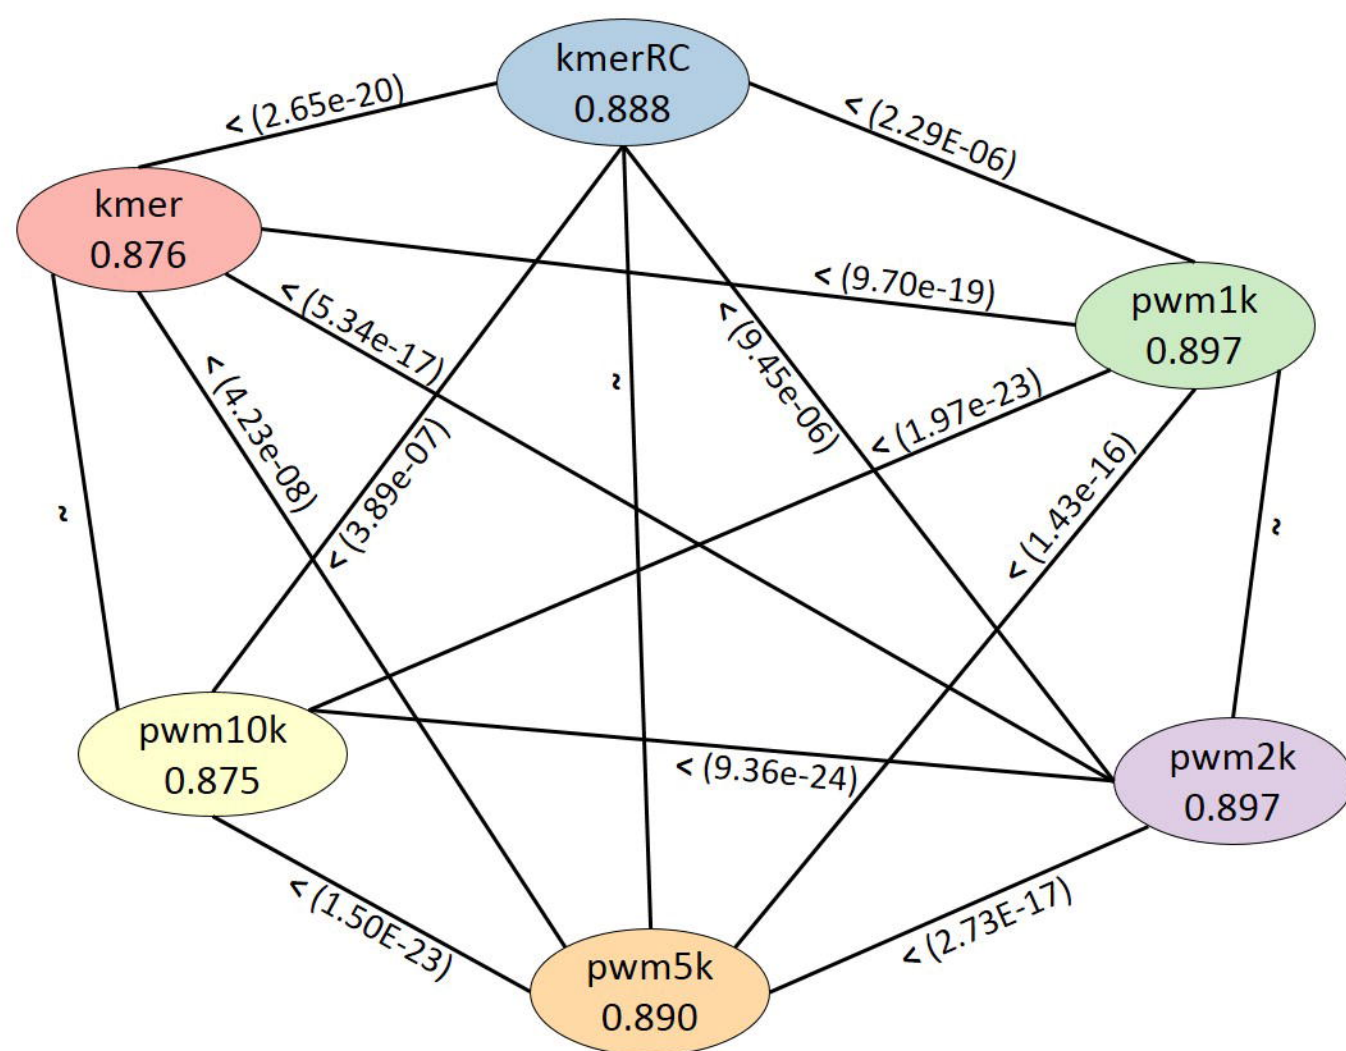

**A**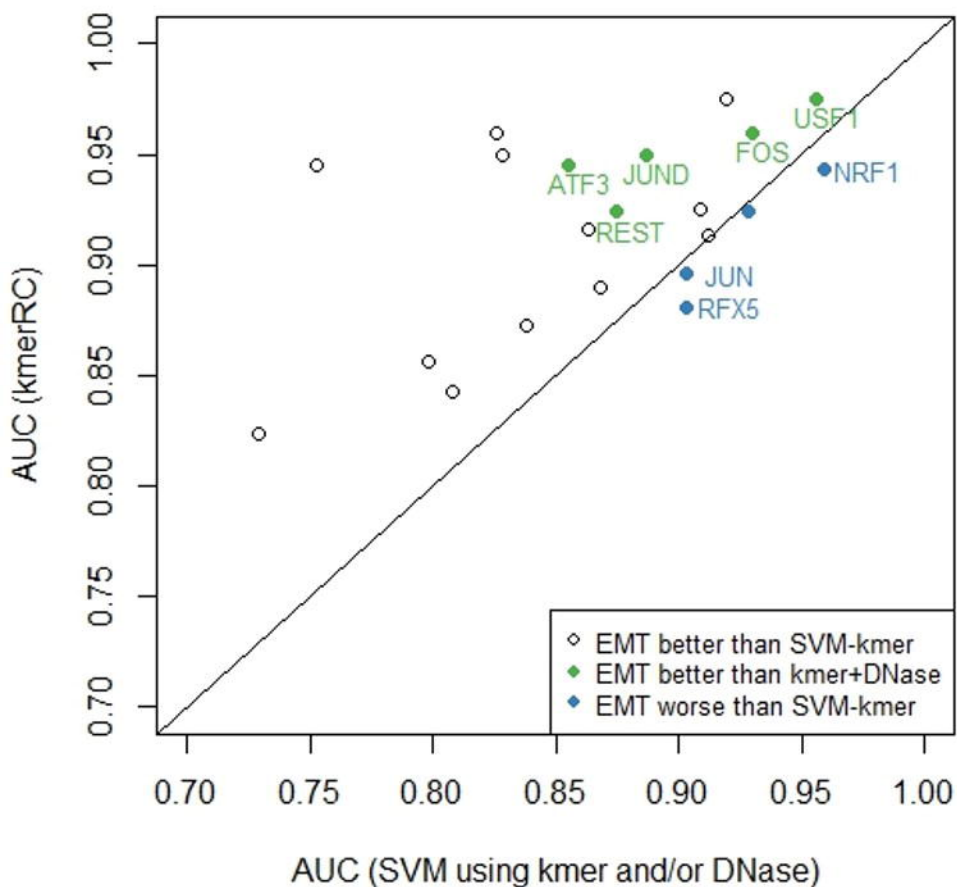**B**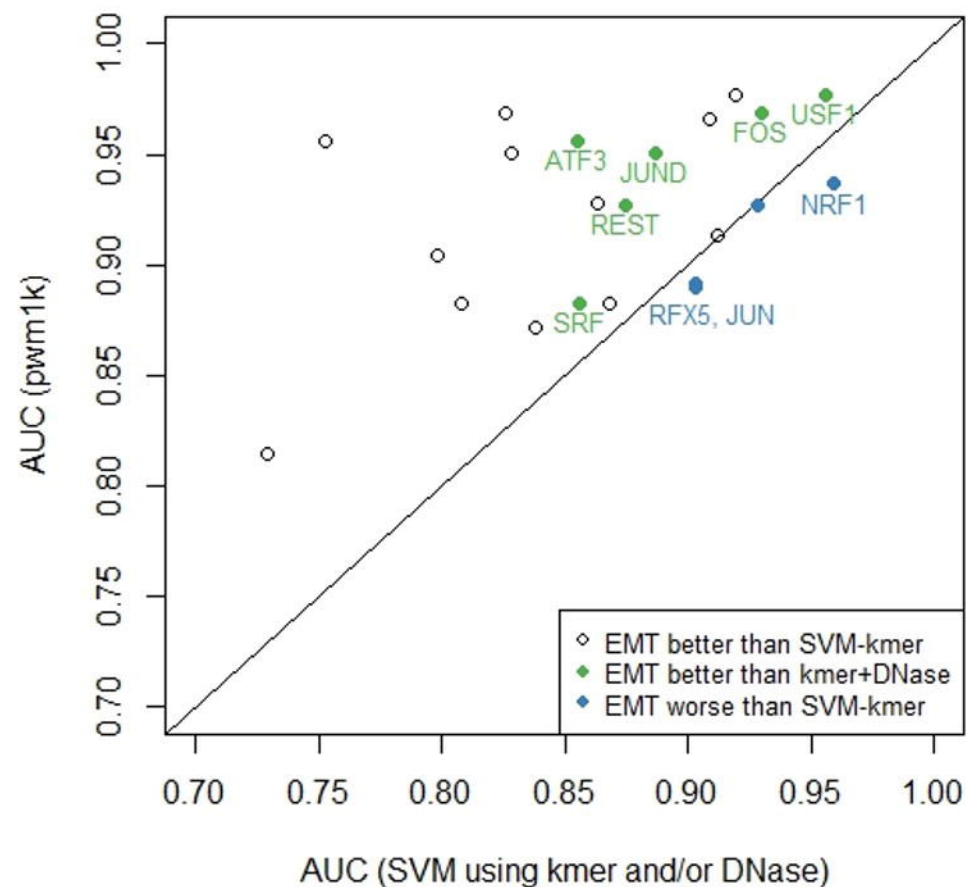

**A**

Color Key

0 6 14  
Value

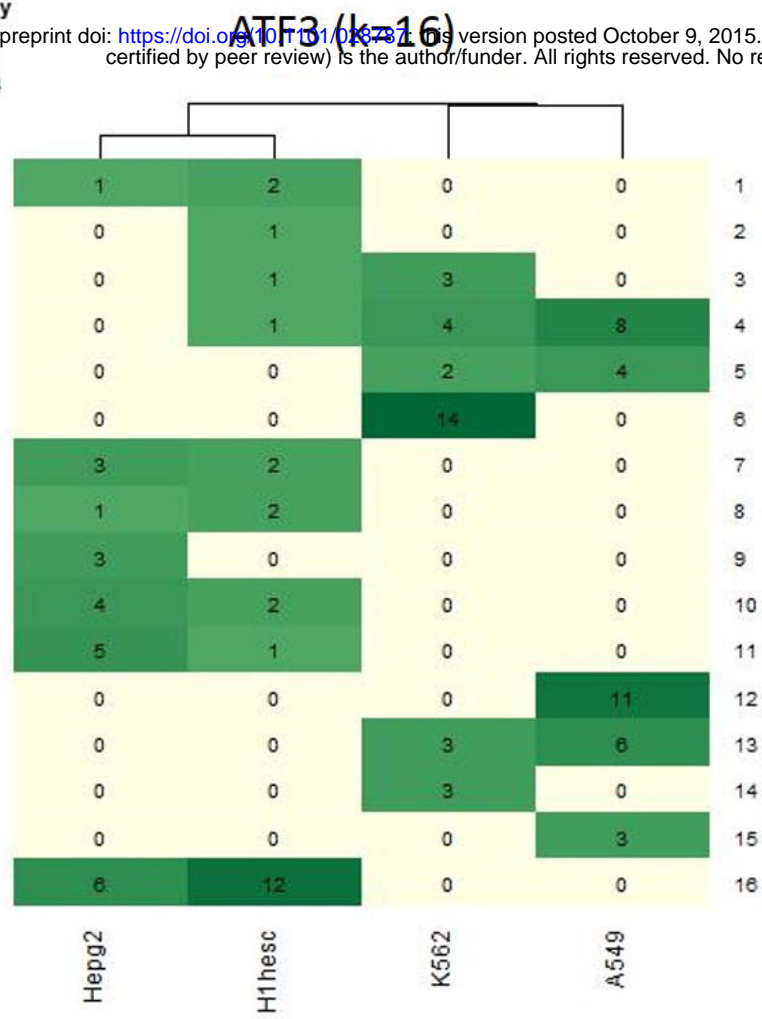**B**

Color Key

0 6  
Value

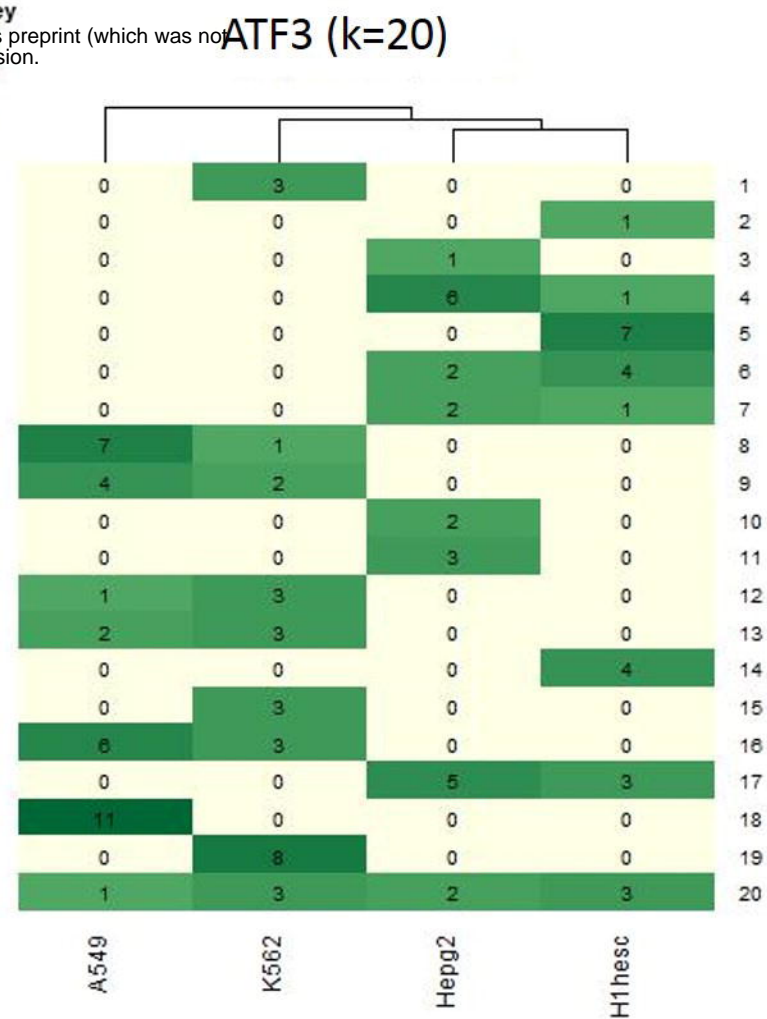**C**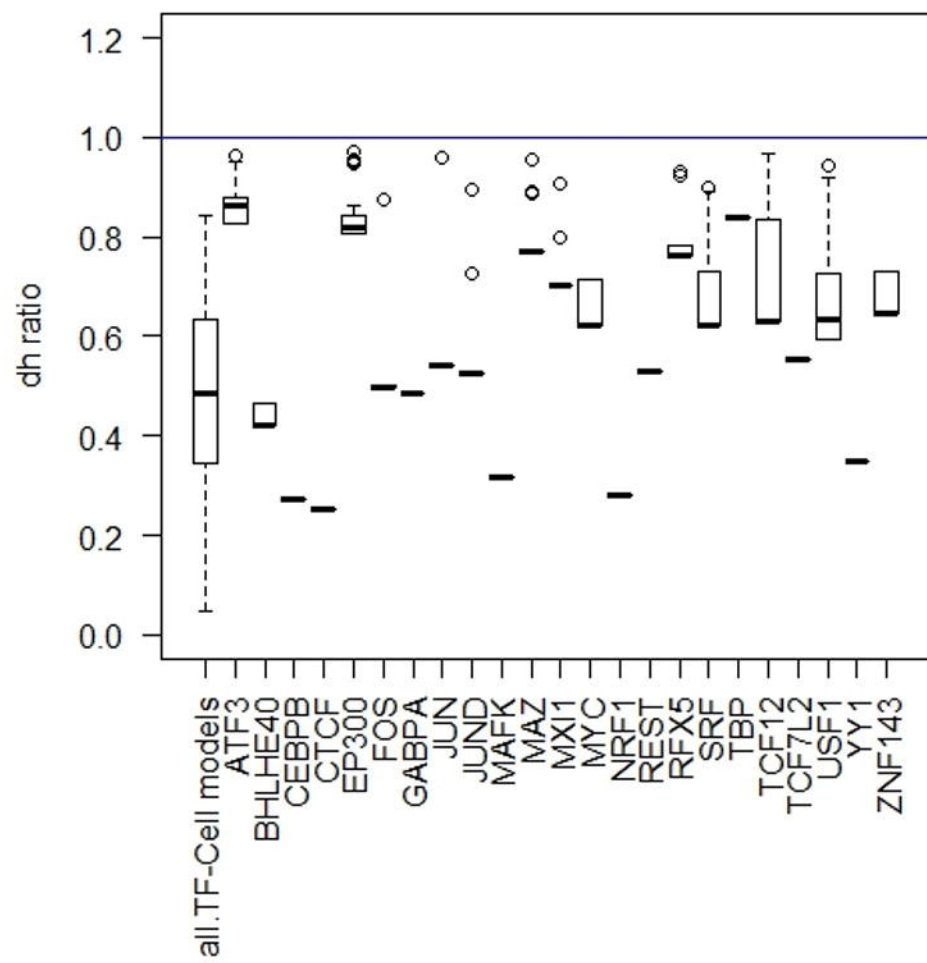**D**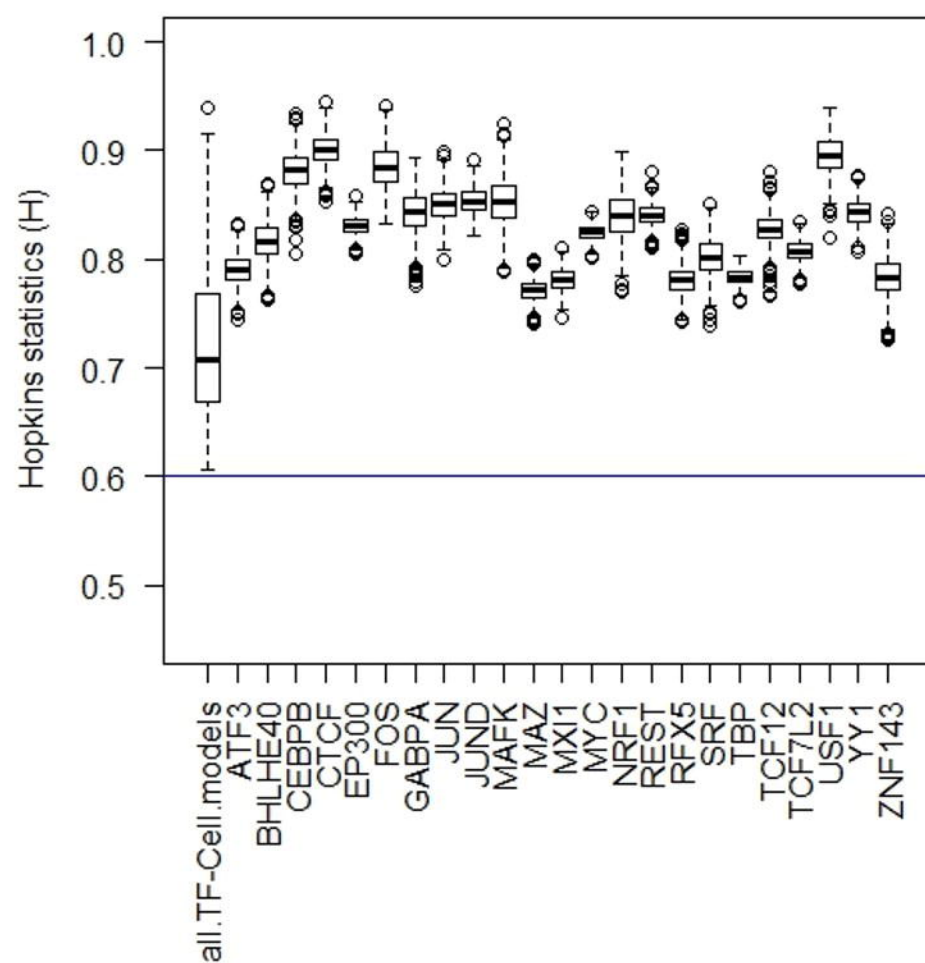



## XYF

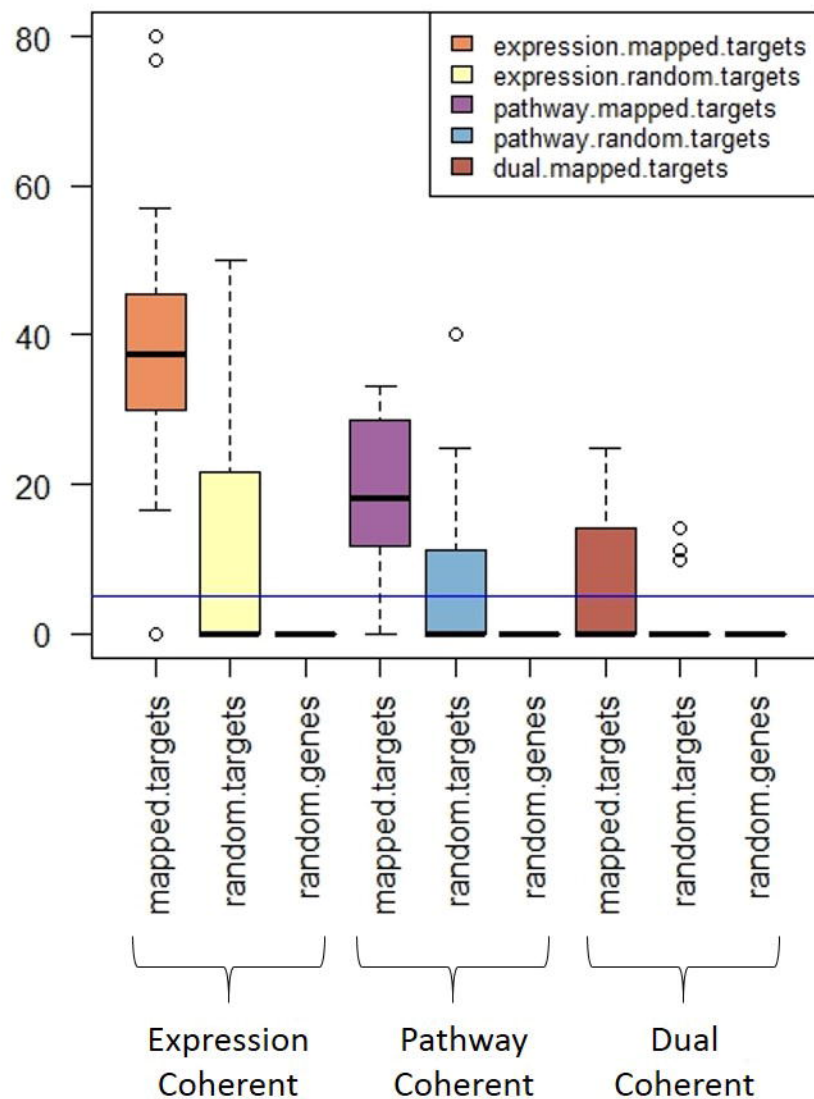

## KNN

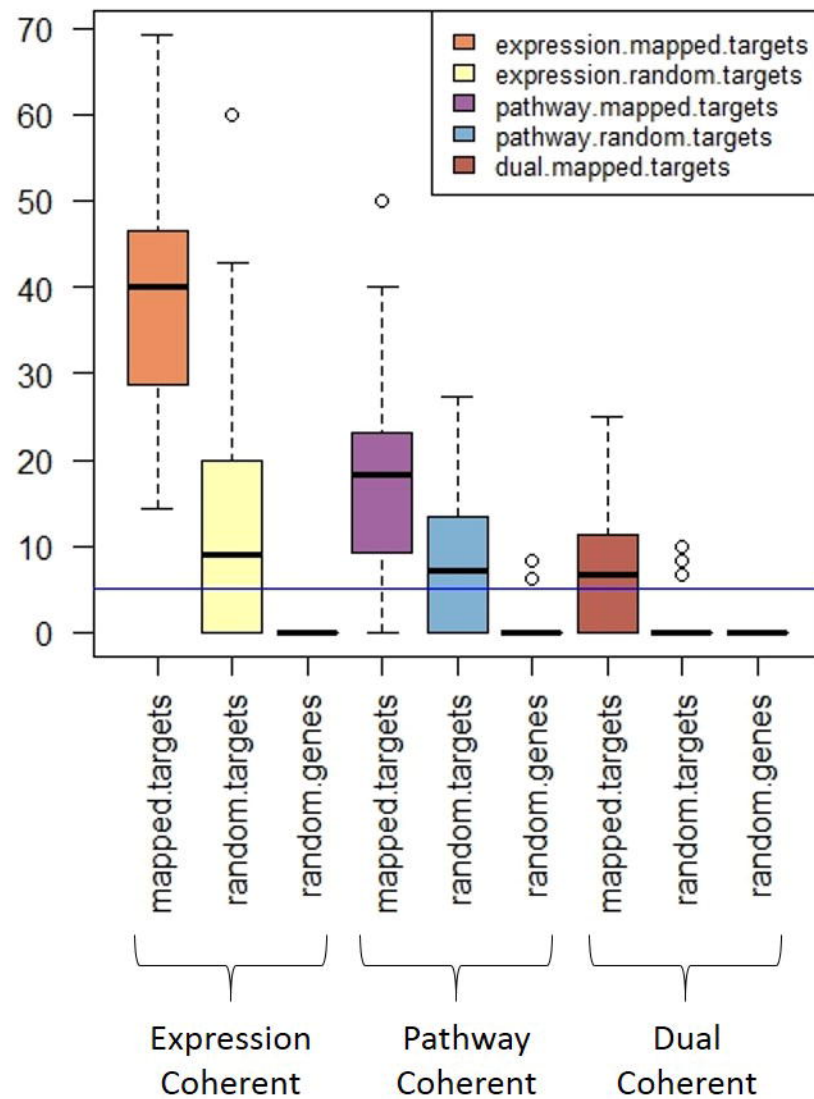

**A**

bioRxiv preprint doi: <https://doi.org/10.1101/028787>; this version posted October 9, 2015. The copyright holder for this preprint (which was not certified by peer review) is the author/funder. All rights reserved. No reuse allowed without permission.

**P.value = 3.5e-24**

**ZNF143**

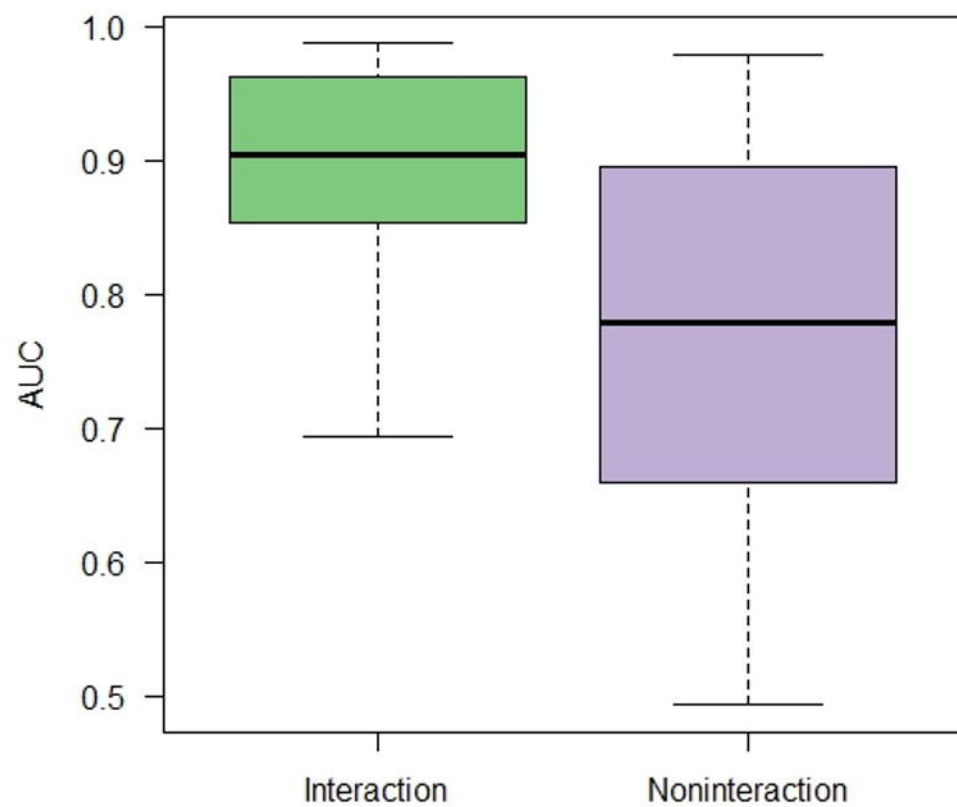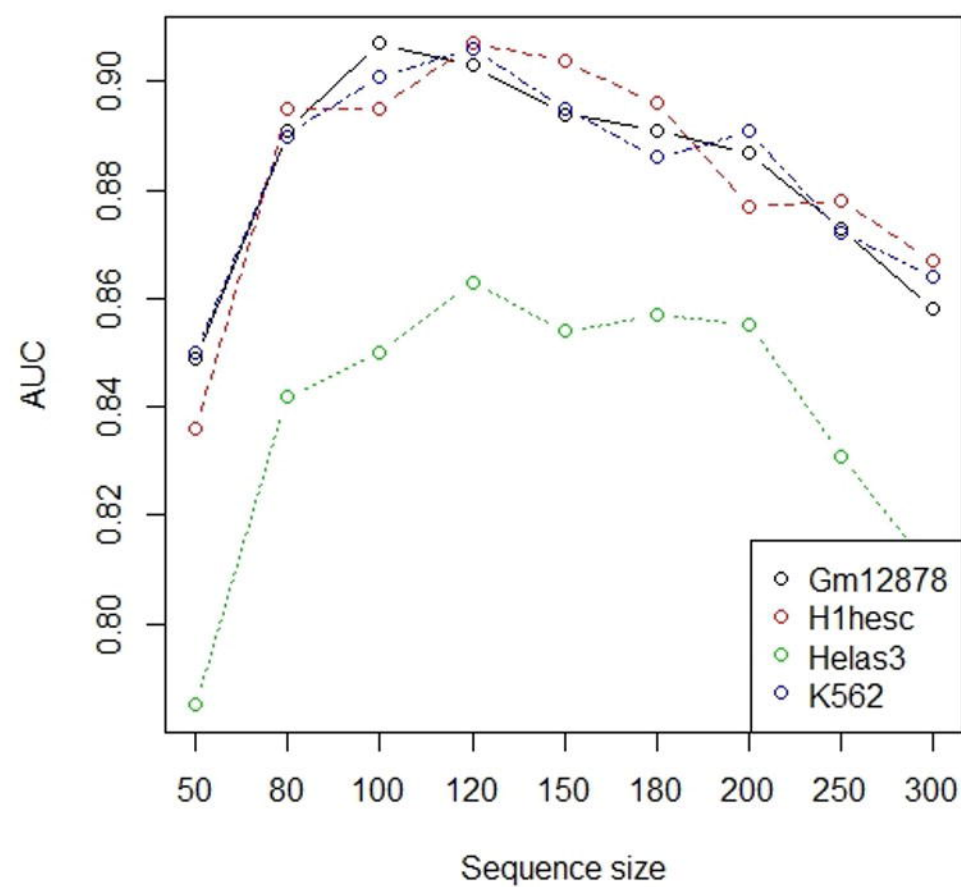**C**

**P.value = 1.08e-20**

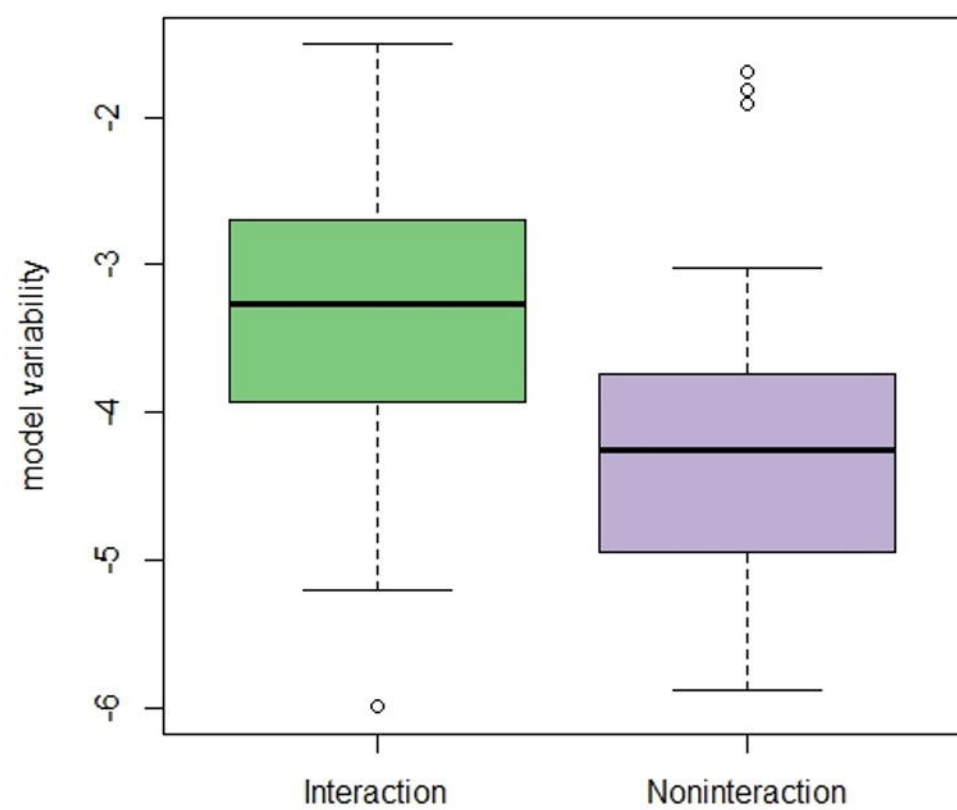**D**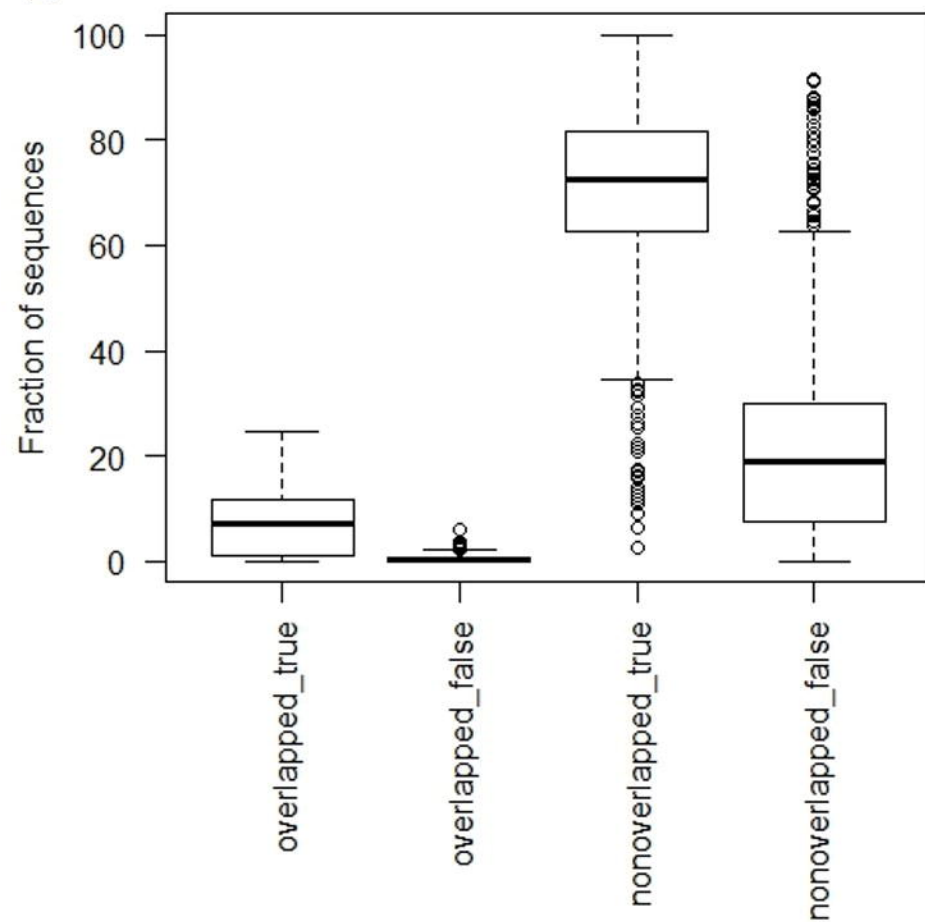

A

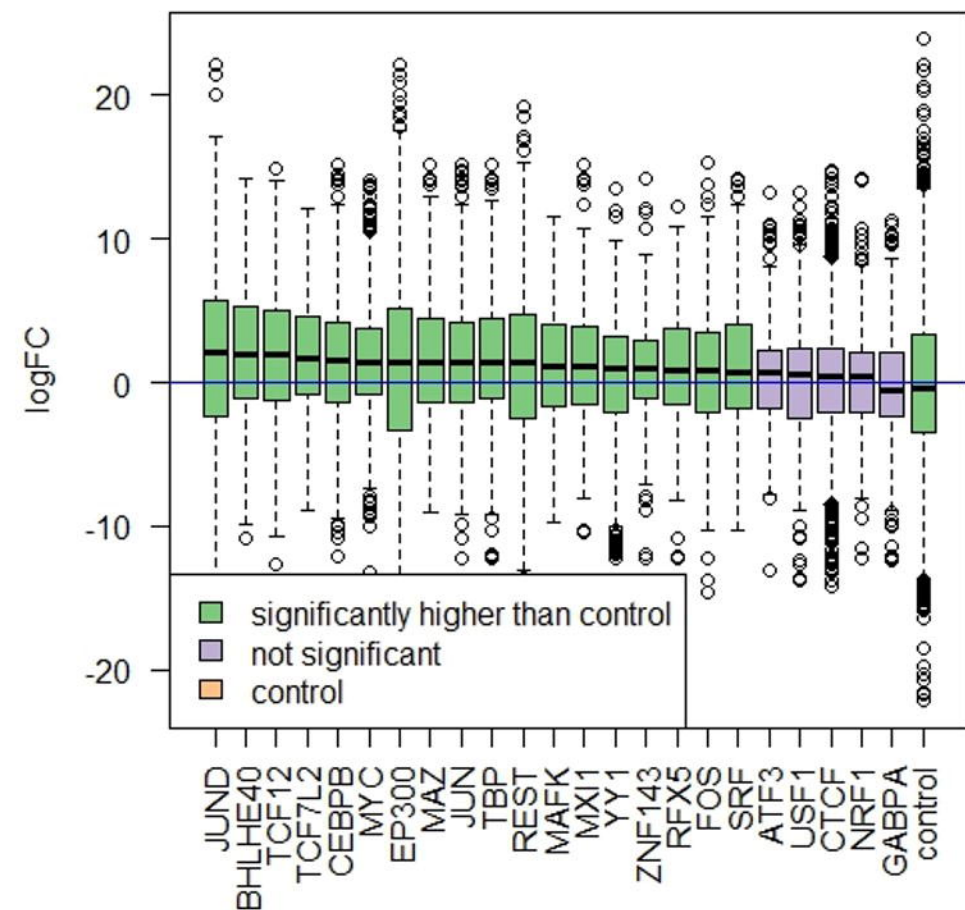

B

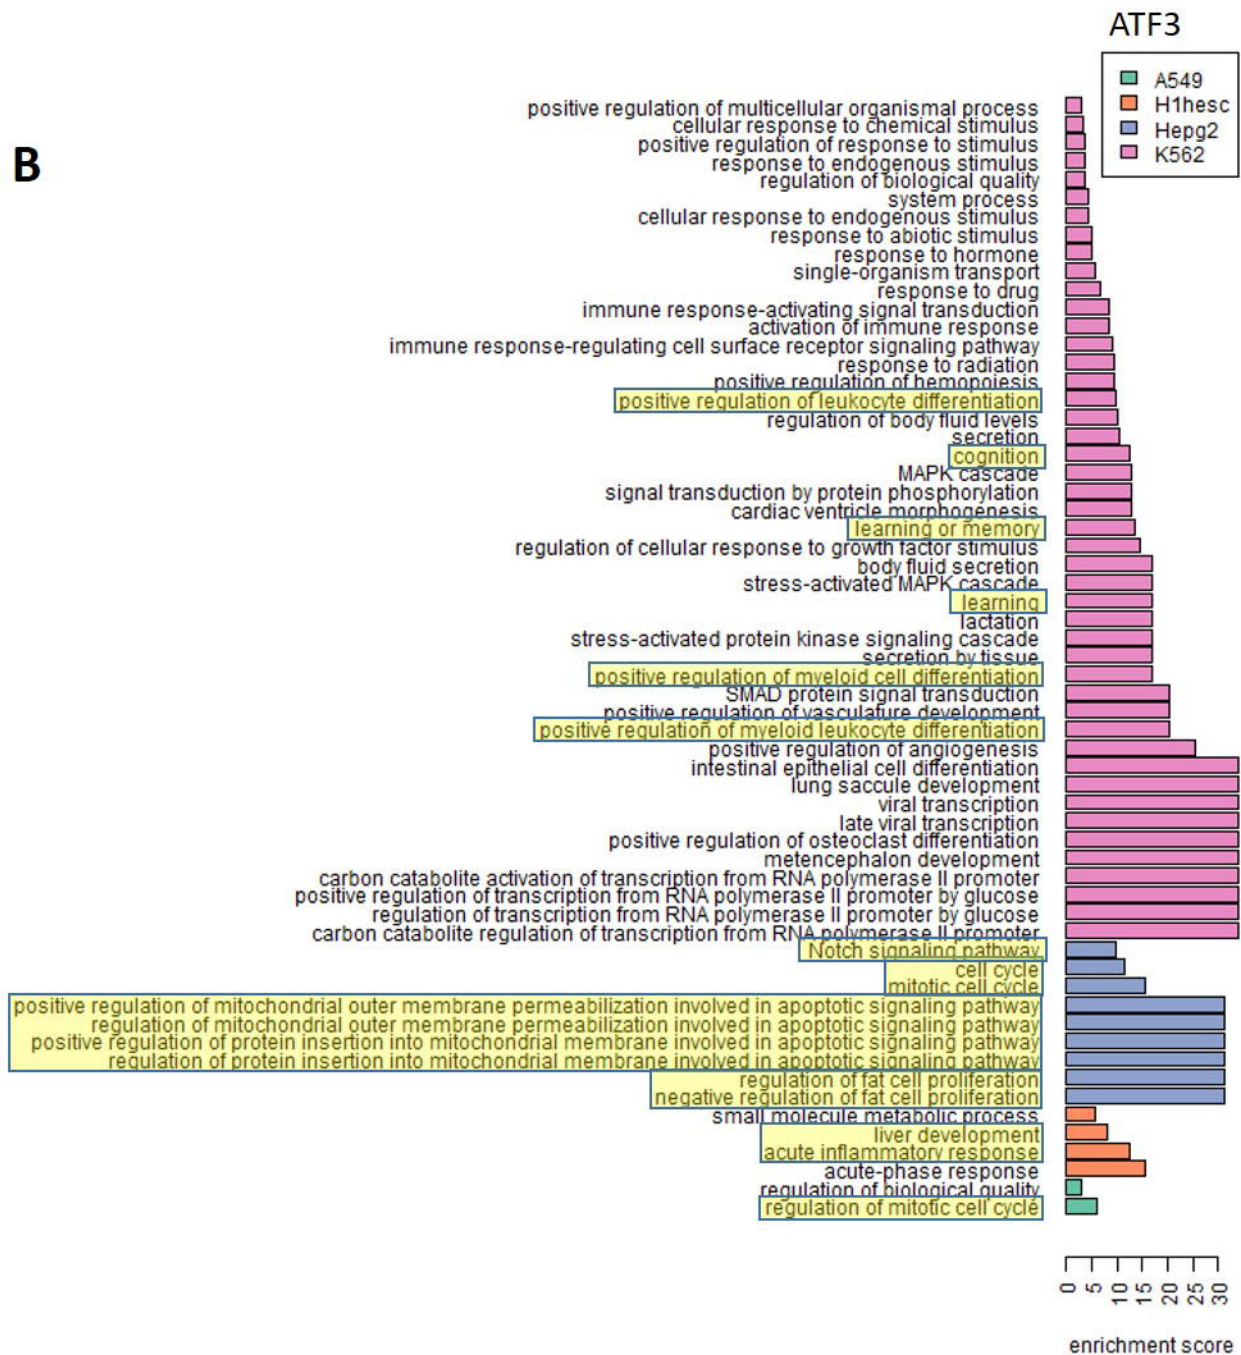

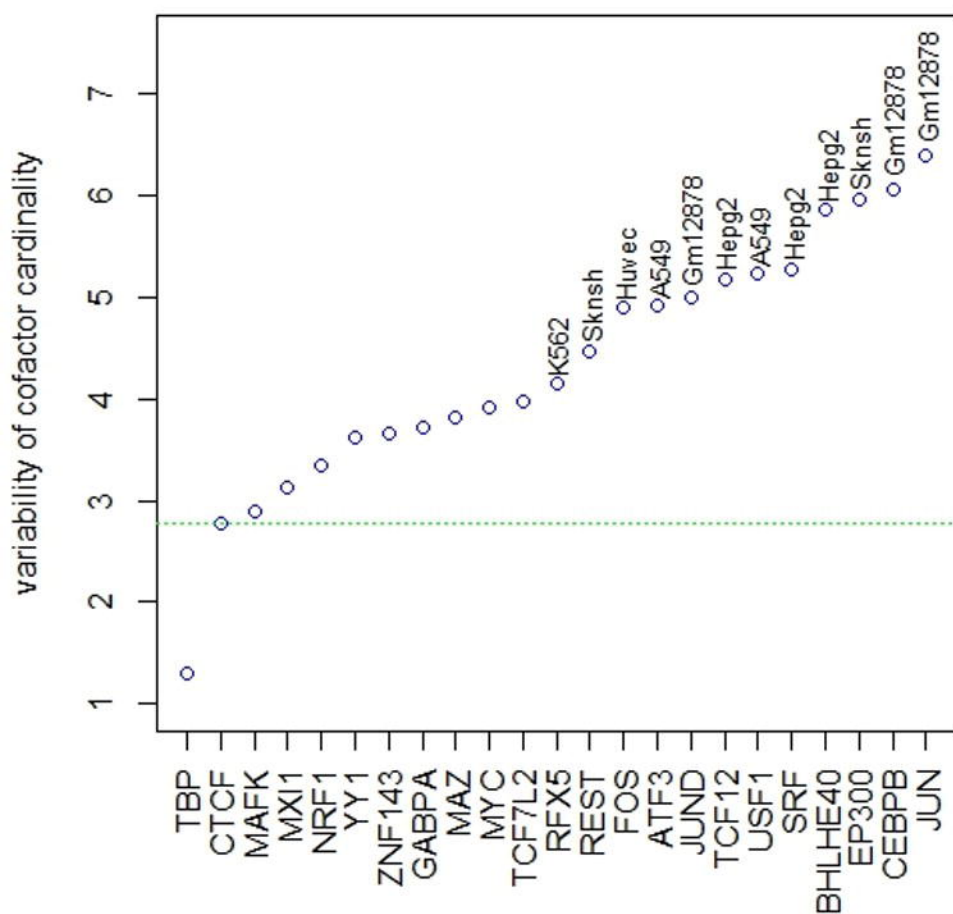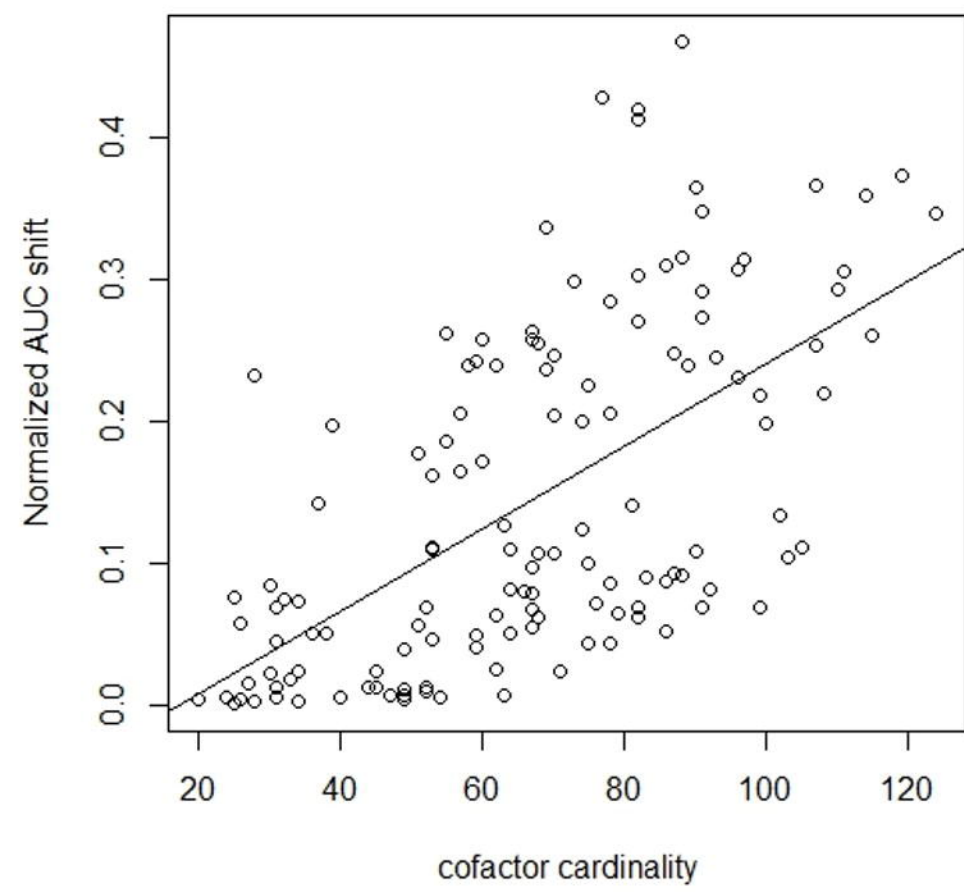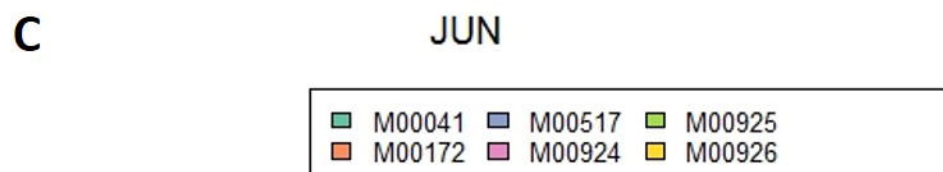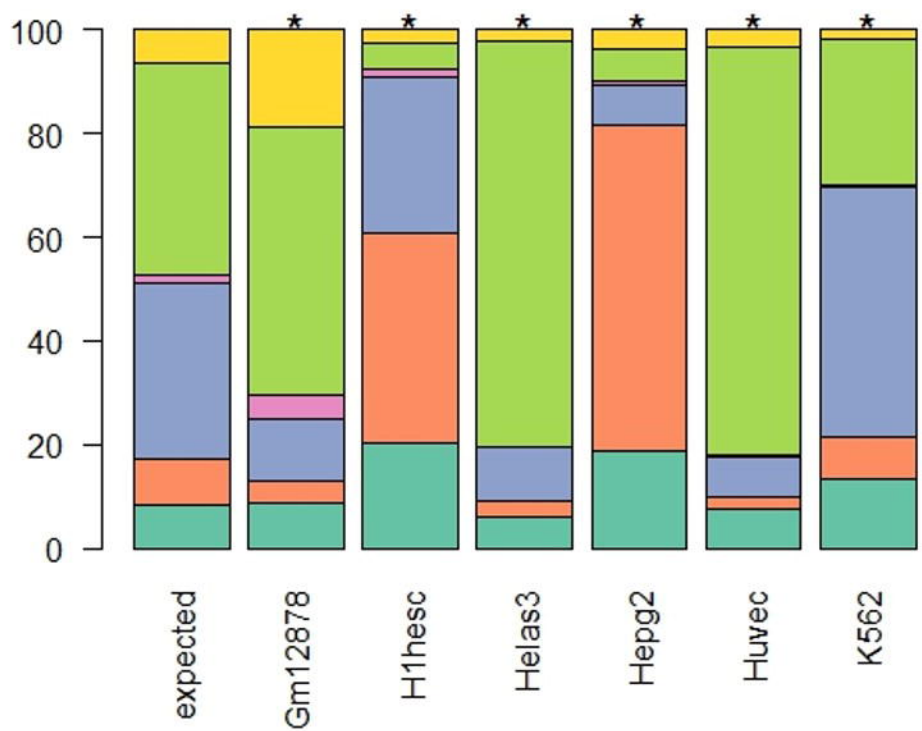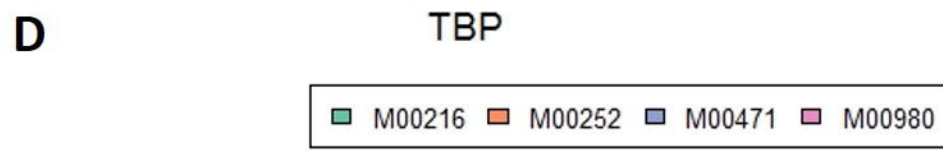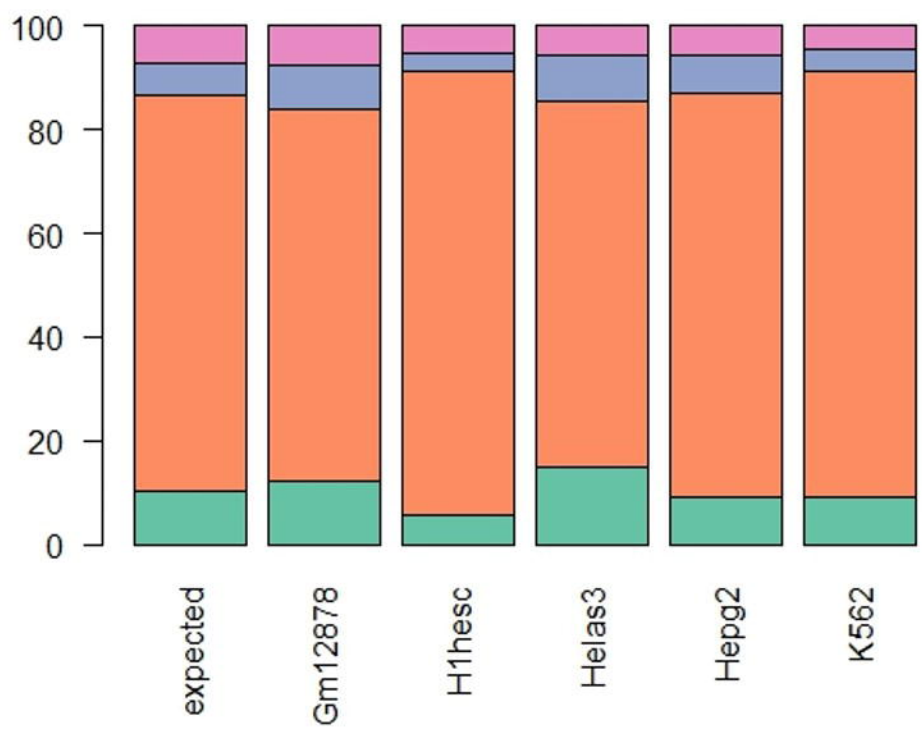

Source: http://biorxiv.org/content/10.1101/028787v1.full.pdf
